# Supplementary material
Source: HighWire-hosted journal article supplement (https://bmjopen.bmj.com/content/8/5/e019912)
Supplement: inline-supplementary-material-4 [file inline-supplementary-material-4.pdf]

Supplementary File 4. Inclusion and Exclusion Criteria for Review of Full-text Articles

| <b>Inclusion Criteria</b>                                                                                                                                                               | <b>Exclusion Criteria</b>                                          |
|-----------------------------------------------------------------------------------------------------------------------------------------------------------------------------------------|--------------------------------------------------------------------|
| Full-text articles                                                                                                                                                                      | Articles not available in full-text (i.e. title or abstracts only) |
| Original data                                                                                                                                                                           | Non-original data                                                  |
| Peer-reviewed articles                                                                                                                                                                  | Grey literature                                                    |
| Physicians and other healthcare providers prescribing/ordering transfusions (any healthcare setting)                                                                                    | Animal studies                                                     |
| RCT or quasi-experimental studies                                                                                                                                                       | Case studies, commentaries, editorials, letters, opinions          |
| Primary objective: efficacy/effectiveness of intervention to modify RBC transfusion practices                                                                                           | Not focused on primary objective                                   |
| Interventions: behaviour modification intervention targeted at healthcare provider RBC transfusion practice (e.g. education, guidelines, audit and feedback, order entry systems, etc.) | Not a behaviour modification intervention                          |
| Comparator: any intervention including no intervention (i.e. standard of care, historical controls)                                                                                     | No comparator                                                      |
| Any outcomes (e.g. physician compliance or patient outcomes)                                                                                                                            |                                                                    |
