# Supplementary material
Source: HighWire-hosted journal article supplement (https://bmjopen.bmj.com/content/8/5/e019912)
Supplement: inline-supplementary-material-5 [file inline-supplementary-material-5.pdf]

Supplementary File 5. Characteristics of Included Studies

| Author (Year) Country                     | Healthcare Setting                                        | Target Clinician Group                                                                                                            | Blood Component     | Study Design     | Type of Control    | Length of Follow-up | RBC Transfusion Criteria                                                                                            | Definition of Inappropriate Transfusion                                                                                 | Types of Interventions          |
|-------------------------------------------|-----------------------------------------------------------|-----------------------------------------------------------------------------------------------------------------------------------|---------------------|------------------|--------------------|---------------------|---------------------------------------------------------------------------------------------------------------------|-------------------------------------------------------------------------------------------------------------------------|---------------------------------|
| <b>Multi-modal Interventions</b>          |                                                           |                                                                                                                                   |                     |                  |                    |                     |                                                                                                                     |                                                                                                                         |                                 |
| Abelow <sup>33</sup> (2017) Israel        | Tertiary care centre                                      | All physicians and nurses from transfusion service, medical, haematology –oncology, surgical and obstetric wards, and anaesthesia | RBC                 | Before and After | Historical Control | 1 year              | Hgb levels below 7 g/dL, or under 8 g/dL in the presence of active ischemia, active bleeding, or symptomatic anemia | NR                                                                                                                      | Education, Reminders            |
| Alavi-Moghaddam <sup>41</sup> (2014) Iran | ED in one academic and general medical/surgical hospital  | All ED staff and blood bank technicians                                                                                           | Blood               | Before and After | Historical Control | 3 months            | NR                                                                                                                  | NR                                                                                                                      | Protocol, Education             |
| Andreasen <sup>42</sup> (2012) Denmark    | Cardiac surgeries in one academically-affiliated hospital | Anesthesiologists, surgeons, intensivists, and nurses                                                                             | RBC, FFP, platelets | Before and After | Historical Control | 24 months           | NR                                                                                                                  | Defined over-transfusion as proportion of patients transfused with RBCs discharged with hemoglobin 7 mmol/L (11.3 g/dL) | Education, Guideline, Algorithm |
| Annan <sup>43</sup> (2013)                | ICU in one academically                                   | All ICU staff                                                                                                                     | RBC                 | Before and       | Historical         | 1 month             | NR                                                                                                                  | NR                                                                                                                      | “High-intensity ICU staffing    |

| Author (Year) Country                     | Healthcare Setting                          | Target Clinician Group               | Blood Component | Study Design     | Type of Control    | Length of Follow-up | RBC Transfusion Criteria                                                                                                                                                                                                                                                                | Definition of Inappropriate Transfusion                                                                      | Types of Interventions                                             |
|-------------------------------------------|---------------------------------------------|--------------------------------------|-----------------|------------------|--------------------|---------------------|-----------------------------------------------------------------------------------------------------------------------------------------------------------------------------------------------------------------------------------------------------------------------------------------|--------------------------------------------------------------------------------------------------------------|--------------------------------------------------------------------|
| United States                             | -affiliated community hospital              |                                      |                 | After            | Control            |                     |                                                                                                                                                                                                                                                                                         |                                                                                                              | (HIS)", including: changes in Protocols, CPOE and Decision Support |
| Ansari <sup>44</sup> (2012) United States | One community hospital                      | All physicians ordering transfusions | RBC             | Before and After | Historical Control | 12 months           | 1) Acute bleeding (blood loss of >30%) with tachycardia and low blood pressure;<br>2) Hgb <9 g/dL in high-risk patients;<br>3) Hgb <7 g/dL in patients with symptomatic chronic anaemia;<br>4) Special circumstances (e.g. sickle cell crisis and other causes of poor oxygen delivery) | Transfusions that did not meet established criteria, including pre-transfusion hgb level greater than 9 g/dL | Guideline, Audit & Feedback                                        |
| Baer <sup>45</sup> (2011) United States   | Four neonatal ICUs in one healthcare system | All neonatal ICU staff               | RBC             | Before and After | Historical Control | 12 months           | Hematocrit falls below: <ul style="list-style-type: none"> <li>• 40% for a patient on extracorporeal membrane oxygenation,</li> <li>• 35% for a patient on</li> </ul>                                                                                                                   | NR                                                                                                           | Guideline, CPOE and Decision Support, and Audit                    |

| Author (Year) Country                    | Healthcare Setting                            | Target Clinician Group                                                                                                      | Blood Component | Study Design     | Type of Control    | Length of Follow-up | RBC Transfusion Criteria                                                                                                                                           | Definition of Inappropriate Transfusion | Types of Interventions        |
|------------------------------------------|-----------------------------------------------|-----------------------------------------------------------------------------------------------------------------------------|-----------------|------------------|--------------------|---------------------|--------------------------------------------------------------------------------------------------------------------------------------------------------------------|-----------------------------------------|-------------------------------|
|                                          |                                               |                                                                                                                             |                 |                  |                    |                     | mechanical ventilation<br>27% for a patient on supplemental oxygen or with signs of anemia but not on mechanical ventilation,<br>• 20% in any neonatal ICU patient |                                         |                               |
| Beaty <sup>46</sup> (2013) United States | Cardiac surgical ICU in one academic hospital | Cardiac surgery attendings, cardiac residents, and ICU providers (intensivists, surgery residents, and mid-level providers) | RBC             | Before and After | Historical Control | 17 weeks            | Hgb level of less than 8 g/dL                                                                                                                                      | Transfusion trigger of hgb >8 g/dL      | Protocol, Audit and Feedback  |
| Brandis <sup>47</sup> (1994) Australia   | One acute care hospital                       | All medical staff that order transfusions in anesthetics, surgery and                                                       | RBC             | Before and After | Historical Control | 6 months            | Hgb level 7 g/dL                                                                                                                                                   | NR                                      | Education, Protocol, Policies |

| Author (Year) Country                      | Healthcare Setting                                     | Target Clinician Group                                                                                           | Blood Component | Study Design     | Type of Control    | Length of Follow-up | RBC Transfusion Criteria                                                                                                                                                                                                                                   | Definition of Inappropriate Transfusion | Types of Interventions                                   |
|--------------------------------------------|--------------------------------------------------------|------------------------------------------------------------------------------------------------------------------|-----------------|------------------|--------------------|---------------------|------------------------------------------------------------------------------------------------------------------------------------------------------------------------------------------------------------------------------------------------------------|-----------------------------------------|----------------------------------------------------------|
|                                            |                                                        | ICU                                                                                                              |                 |                  |                    |                     |                                                                                                                                                                                                                                                            |                                         |                                                          |
| Brandt <sup>48</sup> (2009) United States  | Surgical ICU in one hospital                           | Intensivists, fellows, and residents                                                                             | RBC             | Before and After | Historical Control | 6 years             | Hgb level 8 g/dL                                                                                                                                                                                                                                           | NR                                      | Protocol, Education (to residents)                       |
| Butler <sup>49</sup> (2015) United Kingdom | Inpatient hematology services in one academic hospital | Clinical hematologists treating patients receiving intensive chemotherapy or hematopoietic stem cell transplants | RBC, platelets  | Before and After | Historical Control | 10 months           | 1) Massive bleeding with blood pressure instability;<br>2) Hgb 7 g/dL in a stable ICU patient;<br>3) Hgb 8.0 g/dL in a non-ICU patient with signs/symptoms of anemia;<br>4) Hgb 10 g/dL with acute cardiac ischemia;<br>5) Surgical blood loss anticipated | Above the recommended trigger of 8 g/dL | Education, CPOE and Decision Support, Audit and Feedback |
| Corwin <sup>50</sup> (2014) United States  | One level 1 trauma centre                              | Clinical staff in all major clinical departments, high-volume transfusing services, and residents                | RBC             | Before and After | Historical Control | 18 months           | 1) Acute hemorrhage or hemorrhagic shock;<br>2) Hgb <7–8 g/dL;<br>3) Acute MI, Hgb 8 g/dL;<br>4) Acute coronary syndrome Hgb 8 g/dL;                                                                                                                       | NR                                      | Education, Guideline, CPOE and Decision Support          |

| Author (Year) Country                       | Healthcare Setting | Target Clinician Group                                                                         | Blood Component | Study Design                | Type of Control                                                                                                         | Length of Follow-up | RBC Transfusion Criteria                                                                                                                                                                                                                                                                                                      | Definition of Inappropriate Transfusion | Types of Interventions                                   |
|---------------------------------------------|--------------------|------------------------------------------------------------------------------------------------|-----------------|-----------------------------|-------------------------------------------------------------------------------------------------------------------------|---------------------|-------------------------------------------------------------------------------------------------------------------------------------------------------------------------------------------------------------------------------------------------------------------------------------------------------------------------------|-----------------------------------------|----------------------------------------------------------|
|                                             |                    |                                                                                                |                 |                             |                                                                                                                         |                     | Use of the hgb concentration alone as a trigger for RBC transfusion was recommended against; decision to order an RBC transfusion should also consider a patient's intravascular volume status, evidence of shock, duration and extent of anemia, and cardiopulmonary physiologic parameters as well as other symptomatology. |                                         |                                                          |
| Eindhoven <sup>107</sup> (2005) Netherlands | Two hospitals      | All physicians and nurses treating patients undergoing elective, primary total hip replacement | RBC             | Controlled Before and After | Standard of care in one hospital (i.e. patients transfused at a Hgb level below 10g/dL or haematocrit level below 30%); | 12 months           | 1) Presence of anaemia-related symptoms and signs;<br>2) Diminished oxygen uptake in the lungs due to respiratory disease;<br>3) Inability of the patient to                                                                                                                                                                  | NR                                      | Education, Guideline (referred to as "6-8-10 Flexinorm") |

| Author (Year) Country                          | Healthcare Setting                                 | Target Clinician Group                    | Blood Component     | Study Design     | Type of Control     | Length of Follow-up | RBC Transfusion Criteria                                                                                                                                                                                                                                                                        | Definition of Inappropriate Transfusion | Types of Interventions                                                                                             |
|------------------------------------------------|----------------------------------------------------|-------------------------------------------|---------------------|------------------|---------------------|---------------------|-------------------------------------------------------------------------------------------------------------------------------------------------------------------------------------------------------------------------------------------------------------------------------------------------|-----------------------------------------|--------------------------------------------------------------------------------------------------------------------|
|                                                |                                                    |                                           |                     |                  | Historical Control  |                     | compensate for the effects of haemodilution;<br>4) Estimated blood loss and increased risk of re-bleeding;<br>5) Enhanced need for oxygen delivery (high body temperature, shivering and sepsis); and<br>(6) Presence of symptoms or signs of atherosclerosis of heart, brain or renal vessels. |                                         |                                                                                                                    |
| Frank <sup>34</sup> (2017) United States       | Two academic centers and three community hospitals | All medical staff ordering blood products | RBC, FFP, platelets | Before and After | Historical Controls | 30 months           | Hgb less than 7 g/dL                                                                                                                                                                                                                                                                            | Hgb greater than or equal to 7 g/dL     | “Patient Blood Management Program”, including Education, Guidelines, CPOE and Decision Support, Audit and Feedback |
| Gallagher-Swann <sup>51</sup> (2011) Australia | Two hospitals: one tertiary maternity and          | All medical staff in adult, neonatal, and | Blood               | Before and After | Historical Control  | 28 months           | NR                                                                                                                                                                                                                                                                                              | NR                                      | Protocol, Education, Reminders                                                                                     |

| Author (Year) Country                                   | Healthcare Setting                                            | Target Clinician Group                                                                                      | Blood Component     | Study Design     | Type of Control    | Length of Follow-up | RBC Transfusion Criteria                                                               | Definition of Inappropriate Transfusion                                       | Types of Interventions                                                                                        |
|---------------------------------------------------------|---------------------------------------------------------------|-------------------------------------------------------------------------------------------------------------|---------------------|------------------|--------------------|---------------------|----------------------------------------------------------------------------------------|-------------------------------------------------------------------------------|---------------------------------------------------------------------------------------------------------------|
|                                                         | gynaecological hospital; and one tertiary paediatric hospital | antenatal, and pediatric settings                                                                           |                     |                  |                    |                     |                                                                                        |                                                                               |                                                                                                               |
| Gardner <sup>52</sup> (1993) United States              | One tertiary hospital                                         | All physicians and nurses ordering blood                                                                    | Blood               | Before and After | Historical Control | 3 months            | If ordering for anemia for packed cells: hgb < 10 g/dL or hematocrit below 30%         | Defined over-transfusions as those that did not meet the transfusion criteria | CPOE and Decision Support, Audit and Feedback                                                                 |
| Garrioch <sup>53</sup> (2004) United Kingdom (Scotland) | One academic hospital                                         | All physicians                                                                                              | RBC                 | Before and After | Historical Control | 3 months            | NR                                                                                     | NR                                                                            | Education, Guideline, Audit and Feedback, Reminders                                                           |
| Geissler <sup>54</sup> (2015) Germany                   | One trauma centre                                             | All medical staff involved in cardiac surgeries (e.g. heart transplantation, aortic surgery, valve surgery) | RBC, FFP, platelets | Before and After | Historical Control | 12 months           | NR                                                                                     | NR                                                                            | “Patient Blood Management (PBM) Initiative”, including Education, Guidelines Audit and Feedback, and Policies |
| Goodnough <sup>29 30</sup> (2014a; 2014b) United States | One academic hospital                                         | All physicians ordering transfusions                                                                        | RBC                 | Before and After | Historical Control | 36 months           | Hgb level of 7 g/dL stable medical and surgical inpatients who were not bleeding, or 8 | NR                                                                            | Education, CPOE and Decision Support                                                                          |

| Author (Year) Country                       | Healthcare Setting                                           | Target Clinician Group                                                                                                | Blood Component                      | Study Design     | Type of Control                    | Length of Follow-up | RBC Transfusion Criteria                                                             | Definition of Inappropriate Transfusion                                                                                                                              | Types of Interventions                                                                                                                 |
|---------------------------------------------|--------------------------------------------------------------|-----------------------------------------------------------------------------------------------------------------------|--------------------------------------|------------------|------------------------------------|---------------------|--------------------------------------------------------------------------------------|----------------------------------------------------------------------------------------------------------------------------------------------------------------------|----------------------------------------------------------------------------------------------------------------------------------------|
|                                             |                                                              |                                                                                                                       |                                      |                  |                                    |                     | g/dL for patients with acute coronary syndromes                                      |                                                                                                                                                                      |                                                                                                                                        |
| Gutsche <sup>55</sup> (2013) United States  | Surgical ICU in one academic hospital                        | Cardiologists, cardiac surgeons, anesthesiologists, and intensivists involved in the care of cardiac surgery patients | RBC                                  | Before and After | Historical Control                 | 6 months            | Transfusion associated with a pre-transfusion hgb <7.0 g/dL                          | Transfusion associated with a hgb from 7 mg/dL to 7.9 mg/dL without evidence of organ ischemia, shock, pressor requirement, or hemorrhage                            | Education, Guideline, Audit and Feedback                                                                                               |
| Haldiman <sup>56</sup> (2014) United States | One tertiary-care, Level I trauma hospital                   | All physicians ordering transfusions                                                                                  | RBC, FFP, platelets, cryoprecipitate | Before and After | Historical Control                 | 36 months           | Hgb level of 8 g/dL or less and a hematocrit level of 24% or less as a trigger point | Transfusions not compliant with guideline                                                                                                                            | Guideline, Audit                                                                                                                       |
| Handler <sup>32</sup> (1983) United States  | One community hospital                                       | Surgeons                                                                                                              | RBC                                  | Between groups   | Standard of care in four hospitals | 12 months           | NR                                                                                   | NR                                                                                                                                                                   | Education, Audit and Feedback                                                                                                          |
| Harrison <sup>57</sup> (2015) Australia     | Regional healthcare system comprised of 232 public hospitals | Surgeons in five surgical groups: cardiothoracic, colorectal, gynaecology and obstetrics, Orthopaedic,                | RBC                                  | Before and After | Historical Control                 | 12 months           | NR                                                                                   | When the Hgb min $\geq$ 100 g/dl post-operation; when Hgb min $\geq$ 70 g/l and $\leq$ 100 g/l and when no clinical indications are present; and when Hgb max levels | “Blood Watch Program” that involved 21 different system and behaviour modifying interventions, including Education, Audit and Feedback |



| Author (Year) Country                      | Healthcare Setting                             | Target Clinician Group                                                     | Blood Component        | Study Design     | Type of Control    | Length of Follow-up | RBC Transfusion Criteria                                                  | Definition of Inappropriate Transfusion | Types of Interventions                                                                                                        |
|--------------------------------------------|------------------------------------------------|----------------------------------------------------------------------------|------------------------|------------------|--------------------|---------------------|---------------------------------------------------------------------------|-----------------------------------------|-------------------------------------------------------------------------------------------------------------------------------|
|                                            |                                                | and general surgery                                                        |                        |                  |                    |                     |                                                                           | ≤70 g/l when clinically indicated       |                                                                                                                               |
| Heyes <sup>35</sup> (2017) United Kingdom  | Eight general medical wards at one hospital    | All physicians                                                             | RBC                    | Before and after | Historical Control | 6 months            | Hgb level 7 g/dl for non-bleeding patients                                | Hgb 10 g/dl                             | Education, Policy                                                                                                             |
| Hicks <sup>36</sup> (2017) United States   | Department of surgery in one academic hospital | Attending physicians, clinical fellows, residents, and mid-level providers | RBC, plasma, platelets | Before and After | Historical Control | 9 months            | Hgb level 7 g/dL for standard patients, 8 g/dL for cardiovascular disease | NR                                      | Education, Audit and Feedback                                                                                                 |
| King <sup>58</sup> (2013) United States    | One community hospital                         | All physicians                                                             | RBC                    | Before and After | Historical Control | 8 months            | Hgb level 7 g/dL                                                          | NR                                      | Education, Guideline, Audit and Feedback                                                                                      |
| Larson <sup>104</sup> (2016) United States | One community hospital                         | All physicians                                                             | RBC                    | Before and After | Historical Control | 5 months            | Hgb level 7 g/dL                                                          | Hgb greater than or equal to 7 g/dL     | Education, Policy Audit approval                                                                                              |
| Leahy <sup>59</sup> (2014) Australia       | One academic hospital                          | All physicians                                                             | RBC                    | Before and After | Historical Control | 36 months           | NR                                                                        | NR                                      | “Patient Blood Management Programme”, including Protocol, Education, Guideline, Audit and Feedback, CPOE and decision support |

| <b>Author (Year) Country</b>                        | <b>Healthcare Setting</b>                                                                                                                                                                                             | <b>Target Clinician Group</b>                                                | <b>Blood Component</b> | <b>Study Design</b> | <b>Type of Control</b> | <b>Length of Follow-up</b> | <b>RBC Transfusion Criteria</b>                                                                                                                                                                                                                                                                                                                                            | <b>Definition of Inappropriate Transfusion</b> | <b>Types of Interventions</b>                     |
|-----------------------------------------------------|-----------------------------------------------------------------------------------------------------------------------------------------------------------------------------------------------------------------------|------------------------------------------------------------------------------|------------------------|---------------------|------------------------|----------------------------|----------------------------------------------------------------------------------------------------------------------------------------------------------------------------------------------------------------------------------------------------------------------------------------------------------------------------------------------------------------------------|------------------------------------------------|---------------------------------------------------|
| Likosky <sup>60</sup><br>(2010)<br>United States    | Departments of medicine, surgery, anesthesia, and pathology, and disciplines from nursing, cardiothoracic surgery, anaesthesia, perfusion, quality improvement, transfusion medicine and epidemiology in one hospital | Surgeons treating non-emergent isolated coronary artery bypass graft surgery | RBC                    | Before and After    | Historical Control     | 27 months                  | 1) Intra-operative patients: when haematocrit falls below 19% on cardiopulmonary bypass<br>2) Post-operative patients <75 years: when haematocrit falls below 21% after the procedure until the patient was discharged from the hospital<br>3) Patients >75 years: when haematocrit falls below 24% after the procedure until the patient was discharged from the hospital | NR                                             | Protocol, Education, Audit and Feedback           |
| Littenberg <sup>61</sup><br>(1995)<br>United States | ICU in one hospital                                                                                                                                                                                                   | Intensivists                                                                 | RBC                    | Before and After    | Historical Control     | 3 months                   | During intervention period: Hgb < 8.6 g/dL or hematocrit < 26%<br><br>During follow-up period: Hgb <= 7 g/dL or hematocrit <=21%                                                                                                                                                                                                                                           | NR                                             | Guideline, Order Form and Decision Support, Audit |

| <b>Author (Year) Country</b>                     | <b>Healthcare Setting</b>                   | <b>Target Clinician Group</b>                                                                  | <b>Blood Component</b> | <b>Study Design</b> | <b>Type of Control</b> | <b>Length of Follow-up</b> | <b>RBC Transfusion Criteria</b>                                                                                                                                                                     | <b>Definition of Inappropriate Transfusion</b> | <b>Types of Interventions</b>                             |
|--------------------------------------------------|---------------------------------------------|------------------------------------------------------------------------------------------------|------------------------|---------------------|------------------------|----------------------------|-----------------------------------------------------------------------------------------------------------------------------------------------------------------------------------------------------|------------------------------------------------|-----------------------------------------------------------|
| Lucas <sup>62</sup><br>(1997)<br>Australia       | One hospital                                | All physicians                                                                                 | Blood                  | Before and After    | Historical Control     | 3 months                   | Hgb level 80 g/L                                                                                                                                                                                    | NR                                             | Education, Guideline                                      |
| Mahar <sup>63</sup><br>(2013)<br>Pakistan        | One tertiary care, academic hospital        | All physicians                                                                                 | RBC                    | Before and After    | Historical Control     | 12 months                  | NR                                                                                                                                                                                                  | NR                                             | Protocol, Education                                       |
| Marconi <sup>64</sup><br>(1996)<br>Italy         | One academic hospital                       | All physicians                                                                                 | RBC                    | Before and After    | Historical Control     | 6 months                   | NR                                                                                                                                                                                                  | Post-operative haematocrit above 36%           | Protocol, Education, Guideline, CPOE and Decision Support |
| Markel <sup>65</sup><br>(2016)<br>United States  | Orthopedic services in two "peer" hospitals | Orthopaedic service line practitioners treating patients with primary total joint arthroplasty | RBC                    | Before and After    | Historical Control     | 6 months                   | In post-operative patients: pre-transfusion hgb of 8 g/dL or less or for symptoms of chest pain, orthostatic hypotension, tachycardia unresponsive to fluid resuscitation, congestive heart failure | NR                                             | Education, Guideline, Audit and Feedback                  |
| McCrary <sup>66</sup><br>(2014)<br>United States | Pediatric ICU in one children's hospital    | Pediatric ICU and pediatric hematology attending physicians                                    | RBC                    | Before and After    | Historical Control     | 24 months                  | NR                                                                                                                                                                                                  | NR                                             | Protocol, CPOE and Decision Support                       |

| <b>Author (Year) Country</b>                      | <b>Healthcare Setting</b>                                        | <b>Target Clinician Group</b>                                                                                                    | <b>Blood Component</b> | <b>Study Design</b> | <b>Type of Control</b> | <b>Length of Follow-up</b> | <b>RBC Transfusion Criteria</b>                                                                                                                         | <b>Definition of Inappropriate Transfusion</b> | <b>Types of Interventions</b>                                                  |
|---------------------------------------------------|------------------------------------------------------------------|----------------------------------------------------------------------------------------------------------------------------------|------------------------|---------------------|------------------------|----------------------------|---------------------------------------------------------------------------------------------------------------------------------------------------------|------------------------------------------------|--------------------------------------------------------------------------------|
| Meybohm <sup>105</sup><br>(2016)<br>Germany       | Four academic hospitals                                          | All staff                                                                                                                        | RBC                    | Before and After    | Historical Control     | 21 months                  | Hgb < 6 g/dL independent of any compensation possibility; Hgb 6-8 g/dL clinical symptoms of anemia hypoxia, limited compensation, existing risk factors | NR                                             | “Patient Blood Management program”, including Education, Guidelines, Checklist |
| Morrison <sup>67</sup><br>(1993)<br>United States | Department of Obstetrics and Gynecology in one academic hospital | All staff physicians and residents                                                                                               | RBC, FFP, platelets    | Before and After    | Historical Control     | 10 months                  | NR                                                                                                                                                      | NR                                             | Education, Guideline, Audit and Feedback, Paper Order Form                     |
| Murphy <sup>68</sup><br>(2016)<br>United States   | Seven ICUs in an academic healthcare system                      | Intensivists, advanced practice providers (APPs) (i.e. nurse practitioners and physician assistants), and physicians in training | RBC                    | Before and After    | Historical Control     | 12 months                  | NR                                                                                                                                                      | NR                                             | Education, Audit and Feedback, and Unit-based Provider Financial Incentives    |
| Norgaard <sup>38</sup><br>(2017)                  | One tertiary care hospital                                       | All physicians                                                                                                                   | RBC                    | Before and After    | Historical Control     | 12 months                  | Hgb 7.3 g/dL for stable non-                                                                                                                            | Hgb > 9.7 g/dL                                 | “Patient Blood Management                                                      |

| Author (Year) Country                     | Healthcare Setting                                                            | Target Clinician Group        | Blood Component     | Study Design     | Type of Control    | Length of Follow-up | RBC Transfusion Criteria                                                                                                                                                                                                                                                                                                   | Definition of Inappropriate Transfusion                                                        | Types of Interventions                                             |
|-------------------------------------------|-------------------------------------------------------------------------------|-------------------------------|---------------------|------------------|--------------------|---------------------|----------------------------------------------------------------------------------------------------------------------------------------------------------------------------------------------------------------------------------------------------------------------------------------------------------------------------|------------------------------------------------------------------------------------------------|--------------------------------------------------------------------|
| Denmark                                   |                                                                               | and nurses                    |                     |                  |                    |                     | bleeding patients                                                                                                                                                                                                                                                                                                          |                                                                                                | Intervention”, including Education, Guidelines, Audit and Feedback |
| Oliver <sup>69</sup> (2014) United States | One academic hospital                                                         | All physicians                | RBC, FFP, platelets | Before and After | Historical Control | 6 months            | Hgb 7 g/dL or less in non-bleeding patients (as per TRICC trial)<br><ul style="list-style-type: none"> <li>• Transfuse 1 unit and reassess unless ongoing blood loss (1500 - 2000ml) or hemodynamic instability</li> <li>• Exceptions: active coronary ischemia, ongoing blood loss, severe sepsis/septic shock</li> </ul> | NR                                                                                             | Education, Guideline, Audit and Feedback                           |
| Rana <sup>70</sup> (2006) United States   | Multidisciplinary ICU (medical, surgical, and mixed) in one tertiary academic | All ICU physicians and nurses | RBC                 | Before and After | Historical Control | 3 months            | Hgb level 7g/dL                                                                                                                                                                                                                                                                                                            | Pre-transfusion hgb >7 g/dL in the absence of active bleeding, early septic shock, or ischemia | Education, CPOE and Decision Support, Algorithm                    |

| <b>Author (Year) Country</b>                        | <b>Healthcare Setting</b>          | <b>Target Clinician Group</b>                                                                    | <b>Blood Component</b>               | <b>Study Design</b> | <b>Type of Control</b> | <b>Length of Follow-up</b> | <b>RBC Transfusion Criteria</b>                                                                                                                                | <b>Definition of Inappropriate Transfusion</b> | <b>Types of Interventions</b>                                                        |
|-----------------------------------------------------|------------------------------------|--------------------------------------------------------------------------------------------------|--------------------------------------|---------------------|------------------------|----------------------------|----------------------------------------------------------------------------------------------------------------------------------------------------------------|------------------------------------------------|--------------------------------------------------------------------------------------|
|                                                     | hospital                           |                                                                                                  |                                      |                     |                        |                            |                                                                                                                                                                |                                                |                                                                                      |
| Rehm <sup>71</sup><br>(1998)<br>United States       | One Veteran Affairs hospital       | All staff and residents in medical and surgical specialties from two local university programmes | RBC                                  | Before and After    | Historical Control     | 12 months                  | Hgb level <7 g/dL                                                                                                                                              | Hgb level >10 g/dL                             | Paper order form and Decision Support, Audit and Feedback, Audit Approval, Reminders |
| Rosen <sup>72</sup><br>(1993)<br>United States      | One private tertiary care hospital | All staff                                                                                        | RBC, FFP, platelets, cryoprecipitate | Before and After    | Historical Control     | 36 months                  | Hgb level <8g/dL                                                                                                                                               | Transfusions not meeting transfusion criteria  | Education, Guideline, CPOE and Decision Support, Audit and Feedback                  |
| Rothschild <sup>31</sup><br>(2007)<br>United States | One academic hospital              | All staff                                                                                        | RBC, FFP, platelets                  | Before and After    | Historical Control     | 3 months                   | Hematocrit <21%                                                                                                                                                | Transfusions not meeting transfusion criteria  | Education, Guideline                                                                 |
| Spencer <sup>73</sup><br>(2005)<br>United States    | One hospital                       | All anesthetic and surgical staff treating patients undergoing hip and knee arthroplasty         | RBC                                  | Before and After    | Historical Control     | 12 months                  | Signs of cardiovascular instability from excessive intra-operative blood loss, was symptomatically anaemic postoperatively, or the hgb level fell below 8 g/dL | Transfusions not meeting transfusion criteria  | Guideline, Paper Order Form and Decision Support, Audit and Feedback, Reminders      |
| Tavares <sup>74</sup><br>(2014)                     | One academic                       | All staff                                                                                        | RBC                                  | Before and After    | Historical Control     | 9 years                    | Hgb level between 8-9 g/dL                                                                                                                                     | Hgb level >9g/dL recommended for               | Education, Audit Approval                                                            |

| Author (Year) Country                  | Healthcare Setting                                                      | Target Clinician Group                                                                                                                  | Blood Component        | Study Design     | Type of Control    | Length of Follow-up | RBC Transfusion Criteria                                                                                                                                     | Definition of Inappropriate Transfusion | Types of Interventions                                                             |
|----------------------------------------|-------------------------------------------------------------------------|-----------------------------------------------------------------------------------------------------------------------------------------|------------------------|------------------|--------------------|---------------------|--------------------------------------------------------------------------------------------------------------------------------------------------------------|-----------------------------------------|------------------------------------------------------------------------------------|
| United States                          | tertiary care hospital                                                  |                                                                                                                                         |                        |                  |                    |                     |                                                                                                                                                              | cancellation                            |                                                                                    |
| Ternstrom <sup>75</sup> (2014) Sweden  | Cardiac surgery services in one academic hospital                       | All staff particularly surgeons, anaesthetists, residents, OR-, ICU- and ward nurses, nurse helpers, physiotherapists and perfusionists | RBC, plasma, platelets | Before and after | Historical Control | 24 months           | Hgb level <6 g/dL                                                                                                                                            | NR                                      | “Blood Conservation Programme” consisting of Education, Guidelines, and Self-Audit |
| Tseng <sup>106</sup> (2016) Canada     | One academic hospital                                                   | Residents or attending physicians                                                                                                       | RBC                    | Before and After | Historical Control | 3 months            | Bleeding patients: hgb < 8 g/dL<br>Non-bleeding patients: hgb < 6 g/dL                                                                                       | NR                                      | Checklist, Order Set                                                               |
| Vos <sup>76</sup> (1994) Tanzania      | Eight hospitals: four government hospitals and three missions hospitals | All physicians                                                                                                                          | All blood components   | Before and After | Historical Control | 24 months           | 1) Operated patients: hgb >10 g/dL;<br>2) Pregnancy: hgb >7 g/dL when >36 weeks, hgb >6 g/dL when <36 weeks;<br>3) children: hgb >4 g/dL; other: hgb >5 g/dL | NR                                      | Education, Guideline                                                               |
| Yeh <sup>77</sup> (2015) United States | Surgical ICU in one tertiary care                                       | Residents, fellows, attending                                                                                                           | RBC                    | Before and After | Historical Control | 6 months            | Hgb level <8 g/dL                                                                                                                                            | Hgb level >8 g/dL                       | Education, Audit and Feedback                                                      |

| Author (Year) Country                           | Healthcare Setting                                                                                | Target Clinician Group                              | Blood Component  | Study Design     | Type of Control    | Length of Follow-up | RBC Transfusion Criteria                                                                  | Definition of Inappropriate Transfusion       | Types of Interventions            |
|-------------------------------------------------|---------------------------------------------------------------------------------------------------|-----------------------------------------------------|------------------|------------------|--------------------|---------------------|-------------------------------------------------------------------------------------------|-----------------------------------------------|-----------------------------------|
|                                                 | hospital                                                                                          | physicians of both ICU and surgical teams           |                  |                  |                    |                     |                                                                                           |                                               |                                   |
| Yerrabothala <sup>78</sup> (2014) United States | One academic tertiary care hospital                                                               | All staff                                           | RBC              | Before and After | Historical Control | 6 months            | Hgb level < 7g/dL                                                                         | Transfusions not meeting transfusion criteria | CPOE and Decision Support, Policy |
| Zelinka <sup>79</sup> (2010) United States      | Cardiac surgery services in one community hospital                                                | All medical staff involved in cardiac surgeries     | RBC              | Before and After | Historical Control | 4 years             | NR                                                                                        | NR                                            |                                   |
| <b>Single Interventions</b>                     |                                                                                                   |                                                     |                  |                  |                    |                     |                                                                                           |                                               |                                   |
| Boral <sup>80</sup> (2015) United States        | One tertiary care hospital                                                                        | All medical, surgical, nursing and blood bank staff | RBC              | Before and After | Historical Control | 36 months           | Hgb level of 7 g/dL or Hct of 21%                                                         | NR                                            | Education                         |
| Hillman <sup>81</sup> (1979) United States      | Twenty-two area hospitals                                                                         | All physicians                                      | RBC, whole blood | Before and After | Historical Control | 6 months            | NR                                                                                        | NR                                            | Education                         |
| Joubert <sup>82</sup> (2014) South Africa       | Departments of internal medicine, intensive care, obstetrics & gynaecology and general surgery in | All physicians                                      | RBC              | Before and After | Historical Control | 2 weeks             | Usually appropriate when Hgb ≤ 6.9 g/dL; When Hb 7.0–9.9 g/dL depends on clinical picture | Not required when Hgb level ≥ 10g/dL          | Education                         |



| Author (Year) Country                       | Healthcare Setting                                                          | Target Clinician Group                                                                          | Blood Component      | Study Design                | Type of Control    | Length of Follow-up | RBC Transfusion Criteria                                                                                                                                                                                                                                                                               | Definition of Inappropriate Transfusion       | Types of Interventions |
|---------------------------------------------|-----------------------------------------------------------------------------|-------------------------------------------------------------------------------------------------|----------------------|-----------------------------|--------------------|---------------------|--------------------------------------------------------------------------------------------------------------------------------------------------------------------------------------------------------------------------------------------------------------------------------------------------------|-----------------------------------------------|------------------------|
|                                             | one hospital                                                                |                                                                                                 |                      |                             |                    |                     |                                                                                                                                                                                                                                                                                                        |                                               |                        |
| Joyce <sup>109</sup> (2015) Ireland         | One academic hospital                                                       | Interns                                                                                         | All blood components | Between Groups              | Standard of Care   | 3 months            | NR                                                                                                                                                                                                                                                                                                     | NR                                            | Education              |
| Leão <sup>83</sup> (2015) Brazil            | One academic hospital                                                       | All physicians, nurses, and nursing technicians                                                 | RBC                  | Before and After            | Historical Control | 6 months            | NR                                                                                                                                                                                                                                                                                                     | NR                                            | Education              |
| Paone <sup>84</sup> (2013) United States    | Thirty-three hospitals in one state                                         | Cardiac surgeons                                                                                | RBC, FFP, platelets  | Before and After            | Historical Control | 4 years             | NR                                                                                                                                                                                                                                                                                                     | NR                                            | Education              |
| Soumerai <sup>40</sup> (1993) United States | Surgical and medical services from two academic and two community hospitals | Surgeons in orthopedic, vascular, and general surgery and general medicine attending physicians | RBC                  | Cluster RCT (service-level) | Standard of Care   | 6 months            | 1) Hematocrit <24%, a fall in hematocrit of 6 percentage points or more within 24 hours, or<br>2) A pre-transfusion hematocrit between 24% and 30% in the presence of one of the following: angina within 24 hours prior to transfusion, myocardial infarction within 6 weeks prior to transfusion, an | Transfusions not meeting transfusion criteria | Education              |

| Author (Year) Country                        | Healthcare Setting                                        | Target Clinician Group                                                                                                                                           | Blood Component  | Study Design     | Type of Control    | Length of Follow-up | RBC Transfusion Criteria                                                                                                     | Definition of Inappropriate Transfusion | Types of Interventions |
|----------------------------------------------|-----------------------------------------------------------|------------------------------------------------------------------------------------------------------------------------------------------------------------------|------------------|------------------|--------------------|---------------------|------------------------------------------------------------------------------------------------------------------------------|-----------------------------------------|------------------------|
|                                              |                                                           |                                                                                                                                                                  |                  |                  |                    |                     | electrocardiogram indicating acute ischemia or acute infarction, or 3) Blood loss of 1000 mL or greater prior to transfusion |                                         |                        |
| Valentine <sup>85</sup> (2014) United States | Medical-surgical pediatric ICU in one children's hospital | Pediatric intensivists                                                                                                                                           | RBC, whole blood | Before and After | Historical Control | 24 months           | Hgb level <7 g/dL                                                                                                            | NR                                      | Education              |
| Yaffee <sup>86</sup> (2014) United States    | Cardiac surgery services in one hospital                  | Surgeons, surgical residents, anesthesiologists, perfusionists, and recovery room and intensive care unit nurses, operating on aortic valve replacement patients | RBC              | Before and After | Historical Control | 24 months           | Hgb level <8 g/dL                                                                                                            | NR                                      | Education              |
| Hassan <sup>110</sup> (2010) United States   | One children's hospital                                   | General pediatricians and                                                                                                                                        | Blood            | Between Groups   | Standard of Care   | 36 months           | NR                                                                                                                           | NR                                      | Guideline              |

| Author (Year) Country                       | Healthcare Setting                               | Target Clinician Group                                             | Blood Component                      | Study Design           | Type of Control    | Length of Follow-up | RBC Transfusion Criteria                                                                                                                  | Definition of Inappropriate Transfusion                                                       | Types of Interventions |
|---------------------------------------------|--------------------------------------------------|--------------------------------------------------------------------|--------------------------------------|------------------------|--------------------|---------------------|-------------------------------------------------------------------------------------------------------------------------------------------|-----------------------------------------------------------------------------------------------|------------------------|
|                                             |                                                  | hospitalists                                                       |                                      |                        |                    |                     |                                                                                                                                           |                                                                                               |                        |
| Hoeg <sup>87</sup> (2013) Denmark           | Hematology department in one university hospital | All medical staff treating patients with acute myeloid leukemia    | RBC                                  | Before and After       | Historical Control | 36 months           | Hgb level between 7.3 and 9.7 g/dL and only in the presence of symptomatic anaemia, coronary artery disease, ongoing blood loss or sepsis | NR                                                                                            | Guideline              |
| Horowitz <sup>88</sup> (1991) Saudi Arabia  | One hospital                                     | All physicians treating cardiac surgery patients                   | RBC, FFP, platelets, cryoprecipitate | Before and After       | Historical Control | 6 months            | NR                                                                                                                                        | Transfusions not justified by the results of hgb levels (not specified) and coagulation tests | Guideline              |
| McSwiney <sup>89</sup> (1993) Ireland       | Anesthesia department in one hospital            | All physicians treating patients undergoing total hip arthroplasty | Blood                                | Before and After       | Historical Control | NR                  | Hematocrit less than 30 in men and 27 in women                                                                                            | Discharge hematocrit exceeding 36%                                                            | Guideline              |
| Ciccocioppo <sup>91</sup> (2011) Australia  | One hospital                                     | All medical staff treating patients with lower GI bleed            | RBC                                  | Before and After       | Historical Control | 30 months           | NR                                                                                                                                        | NR                                                                                            | Protocol               |
| Despotis <sup>39</sup> (1994) United States | One hospital                                     | Anesthesiology and surgery staff physicians treating               | RBC, FFP, platelets                  | RCT (individual-level) | Standard of Care   | NR                  | NR                                                                                                                                        | NR                                                                                            | Algorithm              |

| Author (Year) Country                      | Healthcare Setting                                                | Target Clinician Group                                                                                                         | Blood Component | Study Design     | Type of Control    | Length of Follow-up | RBC Transfusion Criteria                          | Definition of Inappropriate Transfusion | Types of Interventions |
|--------------------------------------------|-------------------------------------------------------------------|--------------------------------------------------------------------------------------------------------------------------------|-----------------|------------------|--------------------|---------------------|---------------------------------------------------|-----------------------------------------|------------------------|
|                                            |                                                                   | cardiac surgery patients                                                                                                       |                 |                  |                    |                     |                                                   |                                         |                        |
| Lee <sup>92</sup> (2015) China             | One hospital                                                      | Physicians treating patients for total knee replacement                                                                        | Blood           | Before and After | Historical Control | 4 months            | NR                                                | NR                                      | Protocol               |
| Muller <sup>90</sup> (2004) Switzerland    | Orthopedic unit and intensive care unit in tertiary care hospital | Nurses and physicians in orthopaedic, anaesthesiology, and intensive care treating patients undergoing total joint replacement | RBC             | Before and After | Historical Control | NR                  | Multi-criteria based on implemented guideline     | NR                                      | Algorithm              |
| Rineau <sup>93</sup> (2016) France         | Orthopaedic surgery service in one academic hospital              | All physicians treating patients undergoing total hip arthroplasty or total knee arthroplasty                                  | Blood           | Before and After | Historical Control | 6 months            | Hgb level <7 or 8 g/dL depending on comorbidities | NR                                      | Protocol               |
| Vrotsos <sup>94</sup> (2015) United States | Cardiac unit in one hospital                                      | All physicians                                                                                                                 | Blood           | Before and After | Historical Control | 6 months            | NR                                                | NR                                      | Protocol               |
| Whitney <sup>95</sup> (2013)               | Pediatric operating                                               | All physicians                                                                                                                 | RBC, plasma,    | Before and After | Historical Control | 12 months           | NR                                                | NR                                      | Protocol               |

| <b>Author (Year) Country</b>                       | <b>Healthcare Setting</b>                                     | <b>Target Clinician Group</b>                                                                                                                        | <b>Blood Component</b>     | <b>Study Design</b> | <b>Type of Control</b> | <b>Length of Follow-up</b> | <b>RBC Transfusion Criteria</b>                                                      | <b>Definition of Inappropriate Transfusion</b> | <b>Types of Interventions</b> |
|----------------------------------------------------|---------------------------------------------------------------|------------------------------------------------------------------------------------------------------------------------------------------------------|----------------------------|---------------------|------------------------|----------------------------|--------------------------------------------------------------------------------------|------------------------------------------------|-------------------------------|
| United States                                      | rooms and ICU in one tertiary care children's hospital        | treating pediatric cardiac surgery patients                                                                                                          | platelets, cryoprecipitate |                     |                        |                            |                                                                                      |                                                |                               |
| Torella <sup>96</sup> (2002) United Kingdom        | One academic hospital                                         | All physicians treating patients undergoing coronary artery bypass graft surgery, total hip replacement, colectomy, and transurethral prostatectomy. | RBC                        | Before and After    | Historical Control     | 6 months                   | Hgb level <8g/dL in the absence of symptoms                                          | NR                                             | Policy                        |
| Adams <sup>97</sup> (2011) United States           | Acute care and Pediatric ICU wards in one children's hospital | Pediatricians and pediatric intensivists                                                                                                             | RBC                        | Before and After    | Historical Control     | 12 months                  | NR                                                                                   | NR                                             | CPOE and Decision Support     |
| Fernandez Perez <sup>98</sup> (2007) United States | Three multi-disciplinary ICUs in one hospital                 | Intensivists                                                                                                                                         | RBC                        | Before and After    | Historical Control     | 12 months                  | Hgb level >7 g/dL in the presence of active bleeding, ischemia or early septic shock | NR                                             | CPOE and Decision Support     |

| <b>Author (Year) Country</b>                        | <b>Healthcare Setting</b>                                                                                                                                      | <b>Target Clinician Group</b> | <b>Blood Component</b> | <b>Study Design</b>         | <b>Type of Control</b>               | <b>Length of Follow-up</b> | <b>RBC Transfusion Criteria</b>                                                                                                                                                                                                                                                                                       | <b>Definition of Inappropriate Transfusion</b> | <b>Types of Interventions</b>        |
|-----------------------------------------------------|----------------------------------------------------------------------------------------------------------------------------------------------------------------|-------------------------------|------------------------|-----------------------------|--------------------------------------|----------------------------|-----------------------------------------------------------------------------------------------------------------------------------------------------------------------------------------------------------------------------------------------------------------------------------------------------------------------|------------------------------------------------|--------------------------------------|
| McWilliams <sup>99</sup><br>(2014)<br>United States | Eleven hospitals in a regional healthcare system, including level 1 trauma centers, a cancer treatment hospital, and one centre specializing in women's health | All physicians                | RBC                    | Before and After            | Historical Control                   | 10 months                  | 1) Hgb level of 8.0 g/dL or lower in a non-ICU patient with signs and symptoms of anemia<br>2) Hgb level of 7.5 g/dL or lower in a stable ICU patient<br>3) Hgb level of 10 g/dL or lower with acute cardiac ischemia<br>4) Surgical blood loss anticipated<br>5) Acute bleeding with blood pressure (BP) instability | NR                                             | CPOE and Decision Support            |
| Rothschild <sup>31</sup><br>(2007)<br>United States | One academic hospital                                                                                                                                          | All staff                     | RBC, FFP, platelets    | RCT (individual-level)      | Standard of Care                     | 4 months                   | Hematocrit <21%                                                                                                                                                                                                                                                                                                       | Transfusions not meeting transfusion criteria  | CPOE and Decision Support            |
| Lam <sup>108</sup><br>(1997)<br>United States       | Two "peer" non-academic hospitals                                                                                                                              | All physicians                | RBC, FFP, platelets    | Controlled Before and After | Standard of Care; Historical Control | 4 months                   | NR                                                                                                                                                                                                                                                                                                                    | NR                                             | Reminders (through self-audit)       |
| Pentti <sup>100</sup><br>(2003)<br>Finland          | Medical-surgical ICU in one academic                                                                                                                           | All physicians                | RBC, FFP, platelets    | Before and After            | Historical Control                   | 3 months                   | Hgb level <80 g/L                                                                                                                                                                                                                                                                                                     | Transfusions above the recommended transfusion | Reminders (through electronic audit) |

| Author (Year) Country                            | Healthcare Setting                                           | Target Clinician Group                                     | Blood Component            | Study Design     | Type of Control    | Length of Follow-up | RBC Transfusion Criteria                                                                                                                                                                                                       | Definition of Inappropriate Transfusion       | Types of Interventions |
|--------------------------------------------------|--------------------------------------------------------------|------------------------------------------------------------|----------------------------|------------------|--------------------|---------------------|--------------------------------------------------------------------------------------------------------------------------------------------------------------------------------------------------------------------------------|-----------------------------------------------|------------------------|
|                                                  | hospital                                                     |                                                            |                            |                  |                    |                     |                                                                                                                                                                                                                                | criteria                                      |                        |
| Lam <sup>111</sup> (1996) United States          | Five hospitals including three academic and two non-academic | All physicians                                             | RBC                        | Between Groups   | Standard of Care   | 34 months           | Hgb level $\geq$ 90g/L                                                                                                                                                                                                         | NR                                            | Audit and Feedback     |
| Lewis <sup>101</sup> (2015) United States        | Cancer centre in one academic hospital                       | All physicians treating patients with head and neck cancer | RBC                        | Before and After | Historical Control | 24 months           | NR                                                                                                                                                                                                                             | NR                                            | Audit and Feedback     |
| Tuckfield <sup>102</sup> (1997) Australia        | One hospital                                                 | All medical staff                                          | RBC, FFP, platelets        | Before and After | Historical Control | 3 months            | 1) Hgb $<$ 7 g/dL for severe anemia; 2) Hgb between 7-10 g/dL for anemia, bone marrow failure, anemia and sepsis, continuing blood loss, and abnormal bleeding during an operation; 3) Hgb $<$ 8 g/dL for perioperative period | Transfusions not meeting transfusion criteria | Audit Approval         |
| Politsmakher <sup>103</sup> (2013) United States | Departments of medicine, surgery, obstetrics/                | All physicians                                             | RBC, FFP, platelets, cryo- | Before and After | Historical Control | 24 months           | 1) Symptomatic anemia Hgb $<$ 7 g/dL; 2) Active                                                                                                                                                                                | Transfusions not meeting transfusion          | Audit Approval         |

| Author (Year) Country                       | Healthcare Setting                                                                      | Target Clinician Group | Blood Component | Study Design            | Type of Control    | Length of Follow-up | RBC Transfusion Criteria                                                                                                                                                                                                                                      | Definition of Inappropriate Transfusion | Types of Interventions |
|---------------------------------------------|-----------------------------------------------------------------------------------------|------------------------|-----------------|-------------------------|--------------------|---------------------|---------------------------------------------------------------------------------------------------------------------------------------------------------------------------------------------------------------------------------------------------------------|-----------------------------------------|------------------------|
|                                             | gynecology, pediatrics, and emergency medicine in one community-based academic hospital |                        | precipitate     |                         |                    |                     | bleeding, blood loss 15% of blood volume;<br>3) Chronic transfusion in sickle cell/ thalassemia patients;<br>4) Before major elective procedure Hgb <8 g/dL<br>5) Red cell exchange in sickle cell patients to attain Hgb $\frac{1}{4}$ 10g/dL and Hgb S <30% | criteria                                |                        |
| Madrigal <sup>37</sup> (2017) United States | Two tertiary hospitals, one trauma centre                                               | All physicians         | RBC             | Interrupted Time Series | Historical Control | 3.5 years           | Symptomatic anemia with Hgb less than 7 g/dL; or acute bleed with shock; or symptomatic anemia with Hgb less than 8 g/dL for patients on chemotherapy or with MDS diagnosis; or anemia with Hgb less than 9 with cardiac symptoms, angina, ischemic           | NR                                      | Prospective Audit      |



| <b>Author<br/>(Year)<br/>Country</b> | <b>Healthcare<br/>Setting</b> | <b>Target<br/>Clinician<br/>Group</b> | <b>Blood<br/>Component</b> | <b>Study<br/>Design</b> | <b>Type of<br/>Control</b> | <b>Length of<br/>Follow-up</b> | <b>RBC<br/>Transfusion<br/>Criteria</b> | <b>Definition of<br/>Inappropriate<br/>Transfusion</b> | <b>Types of<br/>Interventions</b> |
|--------------------------------------|-------------------------------|---------------------------------------|----------------------------|-------------------------|----------------------------|--------------------------------|-----------------------------------------|--------------------------------------------------------|-----------------------------------|
|                                      |                               |                                       |                            |                         |                            |                                | EKG changes                             |                                                        |                                   |

ED: emergency department; CPOE: computerized physician order entry; FFP: fresh frozen plasma; GI: gastrointestinal; Hgb: hemoglobin; ICU: intensive care unit; NR: not reported; RBC: red blood cell; RCT: randomized controlled trial;
