# Supplementary material
Source: HighWire-hosted journal article supplement (https://bmjopen.bmj.com/content/8/5/e019912)
Supplement: inline-supplementary-material-6 [file inline-supplementary-material-6.pdf]

| Study                             | Interventions |           |                    |                         |                     |                  |          |          |                |          |                     |            |            |
|-----------------------------------|---------------|-----------|--------------------|-------------------------|---------------------|------------------|----------|----------|----------------|----------|---------------------|------------|------------|
|                                   | Education     | Guideline | Audit and Feedback | CPOE & Decision Support | Protocol/ Algorithm | Paper Order Form | Reminder | Policy   | Audit Approval | Audit    | Financial Incentive | Order Sets | Checklists |
| Rehm (1998) <sup>71</sup>         |               |           | ✓                  |                         |                     | ✓                | ✓        |          | ✓              |          |                     |            |            |
| Rosen (1993) <sup>72</sup>        | ✓             | ✓         | ✓                  | ✓                       |                     |                  |          |          |                |          |                     |            |            |
| Rothschild (2007) <sup>31</sup>   | ✓             | ✓         |                    |                         |                     |                  |          |          |                |          |                     |            |            |
| Spencer (2005) <sup>73</sup>      |               | ✓         | ✓                  |                         |                     | ✓                | ✓        |          |                |          |                     |            |            |
| Tavares (2014) <sup>74</sup>      | ✓             |           |                    |                         |                     |                  |          |          | ✓              |          |                     |            |            |
| Ternstrom (2014) <sup>75</sup>    | ✓             | ✓         |                    |                         |                     |                  |          |          |                | ✓        |                     |            |            |
| Tseng (2016) <sup>106</sup>       |               |           |                    |                         |                     |                  |          |          |                |          |                     | ✓          | ✓          |
| Vos (1994) <sup>76</sup>          | ✓             | ✓         |                    |                         |                     |                  |          |          |                |          |                     |            |            |
| Yeh (2015) <sup>77</sup>          | ✓             |           | ✓                  |                         |                     |                  |          |          |                |          |                     |            |            |
| Yerrabothala (2014) <sup>78</sup> |               |           |                    | ✓                       |                     |                  |          | ✓        |                |          |                     |            |            |
| Zelinka (2010) <sup>79</sup>      |               |           |                    |                         | ✓                   |                  |          |          |                | ✓        |                     |            |            |
| <b>TOTAL</b>                      | <b>38</b>     | <b>25</b> | <b>23</b>          | <b>13</b>               | <b>14</b>           | <b>4</b>         | <b>5</b> | <b>5</b> | <b>3</b>       | <b>6</b> | <b>1</b>            | <b>1</b>   | <b>2</b>   |
