# Supplementary material
Source: HighWire-hosted journal article supplement (https://bmjopen.bmj.com/content/8/5/e019912)
Supplement: inline-supplementary-material-8 [file inline-supplementary-material-8.pdf]

Supplementary File 8. Quality Assessment of Quasi-Experimental Studies Using Adapted Downs and Black Checklist

| Study                         | REPORTING |    |    |    |    |    |    |    |    |     | EXTERNAL VALIDITY |     |     | INTERNAL VALIDITY – BIAS AND CONFOUNDING |     |     |     |     |     |     |     |     |       | Total /22 |
|-------------------------------|-----------|----|----|----|----|----|----|----|----|-----|-------------------|-----|-----|------------------------------------------|-----|-----|-----|-----|-----|-----|-----|-----|-------|-----------|
|                               | Q1        | Q2 | Q3 | Q4 | Q5 | Q6 | Q7 | Q8 | Q9 | Q10 | Q11               | Q12 | Q13 | Q16                                      | Q17 | Q18 | Q19 | Q20 | Q21 | Q22 | Q25 | Q26 |       |           |
| Abelow <sup>33</sup>          | 1         | 1  | 0  | 1  | 0  | 1  | 0  | 0  | 0  | 1   | 1                 | UTD | 1   | 1                                        | 1   | 1   | 1   | 1   | 1   | n/a | UTD | UTD | 13    |           |
| Adams <sup>97</sup>           | 1         | 0  | 1  | 1  | 0  | 1  | 1  | 0  | 0  | 1   | 1                 | UTD | 1   | 1                                        | 1   | 1   | 1   | 1   | 1   | n/a | UTD | UTD | 14    |           |
| Alavi-Moghaddam <sup>41</sup> | 1         | 1  | 0  | 0  | 0  | 1  | 1  | 0  | 0  | 1   | 1                 | UTD | 1   | 1                                        | 1   | 1   | 1   | 1   | 1   | n/a | UTD | UTD | 13    |           |
| Andreasen <sup>42</sup>       | 1         | 0  | 0  | 1  | 0  | 1  | 0  | 0  | 0  | 0   | 1                 | UTD | 1   | 1                                        | 0   | 0   | 1   | 1   | 1   | n/a | UTD | UTD | 9     |           |
| Annan <sup>43</sup>           | 1         | 1  | 1  | 1  | 0  | 1  | 0  | 0  | 0  | 0   | 1                 | UTD | 1   | 1                                        | 0   | 1   | 1   | 1   | 1   | n/a | UTD | UTD | 12    |           |
| Ansari <sup>44</sup>          | 1         | 0  | 0  | 1  | 0  | 1  | 0  | 1  | 0  | 0   | 1                 | UTD | 1   | UTD                                      | 0   | 1   | 1   | 0   | 1   | n/a | UTD | UTD | 9     |           |
| Baer <sup>45</sup>            | 0         | 0  | 1  | 1  | 0  | 1  | 1  | 1  | 0  | 1   | 1                 | UTD | 1   | 1                                        | 1   | 0   | 1   | 1   | 1   | n/a | UTD | UTD | 13    |           |
| Beaty <sup>46</sup>           | 1         | 1  | 1  | 1  | 0  | 1  | 0  | 1  | 0  | 1   | 1                 | UTD | 1   | 1                                        | 0   | 1   | 1   | 1   | 1   | n/a | UTD | UTD | 14    |           |
| Boral <sup>80</sup>           | 1         | 0  | 0  | 1  | 0  | 1  | 1  | 1  | 0  | 1   | 1                 | UTD | 1   | 1                                        | 0   | 1   | 1   | 1   | 1   | n/a | UTD | UTD | 13    |           |
| Brandis <sup>47</sup>         | 0         | 0  | 0  | 1  | 0  | 1  | 0  | 1  | 0  | 0   | 1                 | UTD | 1   | 1                                        | 0   | 1   | 1   | 1   | 1   | n/a | UTD | UTD | 10    |           |
| Brandt <sup>48</sup>          | 1         | 0  | 0  | 1  | 0  | 1  | 0  | 1  | 0  | 1   | 1                 | UTD | 1   | 1                                        | 0   | 1   | 1   | 1   | 1   | n/a | UTD | UTD | 12    |           |
| Butler <sup>49</sup>          | 0         | 1  | 0  | 0  | 1  | 1  | 0  | 1  | 0  | 1   | 1                 | UTD | 1   | 1                                        | 0   | 1   | 1   | 1   | 1   | n/a | UTD | UTD | 12    |           |
| Ciccocioppo <sup>91</sup>     | 0         | 1  | 0  | 1  | 0  | 1  | 1  | 1  | 0  | 0   | 1                 | UTD | 1   | 1                                        | 0   | 1   | 1   | 1   | 1   | n/a | UTD | UTD | 12    |           |
| Corwin <sup>50</sup>          | 0         | 1  | 0  | 1  | 0  | 1  | 1  | 1  | 0  | 1   | 1                 | UTD | 1   | 1                                        | 0   | 1   | 1   | 1   | 1   | n/a | UTD | UTD | 13    |           |
| Eindhoven <sup>107</sup>      | 1         | 0  | 0  | 1  | 0  | 1  | 1  | 1  | 0  | 1   | 1                 | UTD | 1   | 0                                        | 1   | 1   | UTD | 1   | 0   | UTD | UTD | UTD | 11/23 |           |
| Fernandez Perez <sup>98</sup> | 1         | 1  | 0  | 0  | 0  | 1  | 1  | 1  | 0  | 1   | 1                 | UTD | 1   | 1                                        | 1   | 1   | 1   | 1   | 1   | n/a | UTD | UTD | 14    |           |
| Frank <sup>34</sup>           | 1         | 1  | 1  | 1  | 0  | 1  | 0  | 0  | 0  | 1   | 1                 | UTD | 1   | 1                                        | 1   | 1   | 1   | 1   | 1   | n/a | UTD | UTD | 14    |           |

| Study                         | REPORTING |    |    |    |    |    |    |    |    |     | EXTERNAL VALIDITY |     |     | INTERNAL VALIDITY – BIAS AND CONFOUNDING |     |     |     |     |     |     |     |     |       | Total /22 |
|-------------------------------|-----------|----|----|----|----|----|----|----|----|-----|-------------------|-----|-----|------------------------------------------|-----|-----|-----|-----|-----|-----|-----|-----|-------|-----------|
|                               | Q1        | Q2 | Q3 | Q4 | Q5 | Q6 | Q7 | Q8 | Q9 | Q10 | Q11               | Q12 | Q13 | Q16                                      | Q17 | Q18 | Q19 | Q20 | Q21 | Q22 | Q25 | Q26 |       |           |
| Gallagher-Swann <sup>51</sup> | 1         | 0  | 1  | 1  | 0  | 1  | 0  | 0  | 0  | n/a | UTD               | UTD | 1   | UTD                                      | 1   | n/a | 1   | 1   | 1   | n/a | UTD | UTD | 9     |           |
| Gardner <sup>52</sup>         | 1         | 1  | 0  | 1  | 0  | 1  | 0  | 1  | 0  | 0   | 1                 | UTD | 1   | UTD                                      | 0   | 1   | 1   | 1   | 1   | n/a | UTD | UTD | 11    |           |
| Garrioch <sup>53</sup>        | 1         | 1  | 0  | 1  | 0  | 1  | 1  | 1  | 0  | 0   | 1                 | UTD | 1   | UTD                                      | 0   | 1   | 1   | 1   | 1   | n/a | UTD | UTD | 12    |           |
| Geissler <sup>54</sup>        | 1         | 0  | 0  | 1  | 0  | 1  | 1  | 1  | 0  | 1   | 1                 | UTD | 1   | 1                                        | 0   | 1   | 1   | 1   | 1   | n/a | UTD | UTD | 13    |           |
| Goodnough <sup>30</sup>       | 1         | 1  | 0  | 1  | 0  | 1  | 0  | 1  | 0  | 1   | 1                 | UTD | 1   | 0                                        | 0   | 1   | 1   | 1   | 1   | n/a | UTD | UTD | 12    |           |
| Goodnough <sup>29</sup>       | 1         | 1  | 0  | 1  | 0  | 1  | 0  | 1  | 0  | 0   | 1                 | UTD | 1   | 1                                        | 0   | 1   | 1   | 1   | 1   | n/a | UTD | UTD | 12    |           |
| Gutsche <sup>55</sup>         | 1         | 0  | 0  | 1  | 0  | 1  | 1  | 1  | 0  | 1   | 1                 | UTD | 1   | 1                                        | 0   | 1   | 1   | 1   | 1   | n/a | UTD | UTD | 13    |           |
| Haldiman <sup>56</sup>        | 1         | 1  | 0  | 1  | 0  | 1  | 0  | 0  | 0  | n/a | 1                 | UTD | 1   | UTD                                      | 1   | n/a | 1   | 1   | 1   | n/a | UTD | UTD | 10    |           |
| Handler <sup>32</sup>         | 0         | 1  | 0  | 1  | 0  | 0  | 0  | 0  | 0  | n/a | 1                 | UTD | 1   | 1                                        | 1   | n/a | UTD | 1   | 0   | 1   | UTD | UTD | 8/23  |           |
| Harrison <sup>57</sup>        | 1         | 1  | 0  | 1  | 0  | 1  | 0  | 1  | 0  | 0   | 1                 | UTD | 1   | 1                                        | 0   | 1   | 1   | 1   | 1   | n/a | UTD | UTD | 12    |           |
| Hassan <sup>110</sup>         | 1         | 1  | 0  | 0  | 0  | 1  | 1  | 1  | 0  | 1   | 1                 | UTD | 1   | 1                                        | 1   | 0   | 1   | 1   | 0   | 1   | UTD | UTD | 13/23 |           |
| Heyes <sup>35</sup>           | 1         | 1  | 0  | 1  | 0  | 1  | 0  | 0  | 0  | 0   | 1                 | UTD | 1   | 1                                        | 1   | 1   | 1   | 1   | 1   | n/a | UTD | UTD | 12    |           |
| Hicks <sup>36</sup>           | 1         | 1  | 0  | 1  | 0  | 1  | 0  | 0  | 0  | 1   | 1                 | UTD | 1   | 1                                        | 1   | 1   | 1   | 1   | 1   | n/a | UTD | UTD | 13    |           |
| Hillman <sup>81</sup>         | 1         | 0  | 0  | 0  | 0  | 1  | 1  | 0  | 0  | 0   | 1                 | UTD | 1   | 1                                        | 0   | 1   | 1   | 1   | 1   | n/a | UTD | UTD | 10    |           |
| Hoeg <sup>87</sup>            | 1         | 1  | 0  | 1  | 0  | 1  | 1  | 1  | 0  | 1   | 1                 | UTD | 1   | UTD                                      | 1   | 1   | 1   | 1   | 1   | n/a | UTD | UTD | 14    |           |
| Horowitz <sup>88</sup>        | 1         | 0  | 0  | 1  | 0  | 1  | 0  | 0  | 0  | 0   | 1                 | UTD | 1   | 1                                        | 1   | 1   | 1   | 1   | UTD | 1   | n/a | UTD | UTD   | 10        |
| Joubert <sup>82</sup>         | 1         | 1  | 0  | 1  | 0  | 1  | 0  | 0  | 0  | 1   | 1                 | UTD | 1   | 1                                        | 1   | 1   | 1   | 1   | 1   | n/a | UTD | UTD | 13    |           |
| Joyce <sup>109</sup>          | 1         | 0  | 0  | 1  | 0  | 1  | 1  | 0  | 1  | 0   | UTD               | UTD | 1   | 1                                        | 1   | 1   | 1   | UTD | 1   | 1   | UTD | UTD | UTD   | 11/23     |

| Study                    | REPORTING |    |    |    |    |    |    |    |    |     | EXTERNAL VALIDITY |     |     | INTERNAL VALIDITY – BIAS AND CONFOUNDING |     |     |     |     |     |     |     |     |       | Total /22 |
|--------------------------|-----------|----|----|----|----|----|----|----|----|-----|-------------------|-----|-----|------------------------------------------|-----|-----|-----|-----|-----|-----|-----|-----|-------|-----------|
|                          | Q1        | Q2 | Q3 | Q4 | Q5 | Q6 | Q7 | Q8 | Q9 | Q10 | Q11               | Q12 | Q13 | Q16                                      | Q17 | Q18 | Q19 | Q20 | Q21 | Q22 | Q25 | Q26 |       |           |
| King <sup>58</sup>       | 1         | 1  | 0  | 1  | 0  | 1  | 0  | 1  | 0  | 0   | 1                 | UTD | 1   | 1                                        | 1   | 1   | 1   | 1   | 1   | n/a | UTD | UTD | 13    |           |
| Lam <sup>108</sup>       | 1         | 1  | 1  | 0  | 0  | 1  | 0  | 0  | 0  | 1   | 1                 | UTD | 1   | 1                                        | 1   | 0   | 1   | 1   | 0   | 1   | UTD | UTD | 13/23 |           |
| Lam <sup>111</sup>       | 1         | 1  | 0  | 1  | 0  | 1  | 0  | 0  | 0  | 1   | 1                 | UTD | 1   | 1                                        | UTD | 1   | UTD | 1   | 1   | 1   | UTD | UTD | 12/23 |           |
| Larson <sup>104</sup>    | 1         | 1  | 0  | 1  | 0  | 1  | 0  | 0  | 0  | 1   | 1                 | UTD | 1   | 1                                        | 1   | 1   | 1   | 1   | 1   | n/a | UTD | UTD | 13    |           |
| Leahy <sup>59</sup>      | 0         | 1  | 0  | 1  | 0  | 1  | 1  | 1  | 0  | 1   | 1                 | UTD | 1   | 1                                        | 1   | 1   | 1   | 1   | 1   | n/a | UTD | UTD | 14    |           |
| Leão <sup>83</sup>       | 1         | 1  | 0  | 1  | 0  | 1  | 0  | 0  | 0  | 1   | 1                 | UTD | 1   | 1                                        | 1   | 1   | 1   | 1   | 1   | n/a | UTD | UTD | 13    |           |
| Lee <sup>92</sup>        | 0         | 1  | 0  | 1  | 0  | 1  | 0  | 0  | 0  | 1   | 1                 | UTD | 1   | 1                                        | 0   | 1   | 1   | 1   | 1   | n/a | UTD | UTD | 11    |           |
| Lewis <sup>101</sup>     | 0         | 1  | 0  | 1  | 0  | 1  | 1  | 1  | 0  | 1   | 1                 | UTD | 1   | 1                                        | 1   | 1   | 1   | 1   | 1   | n/a | UTD | UTD | 14    |           |
| Likosky <sup>60</sup>    | 1         | 1  | 0  | 1  | 0  | 1  | 0  | 1  | 0  | 1   | 1                 | UTD | 1   | 1                                        | 1   | 1   | 1   | 1   | 1   | n/a | UTD | UTD | 14    |           |
| Littenberg <sup>61</sup> | 1         | 1  | 0  | 1  | 0  | 1  | 0  | 1  | 0  | 1   | 1                 | UTD | 1   | 1                                        | 1   | 1   | 1   | 1   | 1   | n/a | UTD | UTD | 14    |           |
| Lucas <sup>62</sup>      | 0         | 1  | 0  | 1  | 0  | 1  | 0  | 1  | 0  | 0   | 1                 | UTD | 1   | 1                                        | 1   | 1   | 1   | 1   | 1   | n/a | UTD | UTD | 12    |           |
| Madrigal <sup>37</sup>   | 1         | 1  | 0  | 1  | 0  | 1  | 1  | 0  | 0  | 1   | 1                 | UTD | 1   | 1                                        | 1   | 1   | 1   | 1   | 1   | n/a | UTD | UTD | 14    |           |
| Mahar <sup>63</sup>      | 1         | 1  | 0  | 1  | 0  | 1  | 0  | 0  | 0  | 0   | 1                 | UTD | 1   | 1                                        | 1   | 1   | 1   | 1   | 1   | n/a | UTD | UTD | 12    |           |
| Markel <sup>65</sup>     | 1         | 1  | 0  | 1  | 0  | 1  | 1  | 1  | 0  | 1   | 1                 | UTD | 1   | 1                                        | 1   | 1   | 1   | 1   | 1   | n/a | UTD | UTD | 15    |           |
| Meybohm <sup>105</sup>   | 1         | 1  | 0  | 1  | 0  | 1  | 1  | 1  | 0  | 1   | 1                 | UTD | 1   | 1                                        | 0   | 1   | 1   | 1   | 1   | n/a | UTD | UTD | 14    |           |
| McCrary <sup>66</sup>    | 1         | 1  | 0  | 1  | 0  | 1  | 1  | 1  | 0  | 1   | 1                 | UTD | 1   | 1                                        | 1   | 1   | 1   | 1   | 1   | n/a | UTD | UTD | 15    |           |
| McSwiney <sup>89</sup>   | 1         | 1  | 0  | 1  | 0  | 1  | 1  | 1  | 0  | 0   | 1                 | UTD | 1   | 1                                        | 1   | 1   | 1   | 1   | 1   | n/a | UTD | UTD | 14    |           |
| McWilliams <sup>99</sup> | 1         | 0  | 0  | 1  | 0  | 1  | 0  | 1  | 0  | 1   | 1                 | UTD | 1   | 1                                        | 1   | 1   | 1   | 1   | 1   | n/a | UTD | UTD | 13    |           |

| Study                       | REPORTING |    |    |    |    |    |    |    |    |     | EXTERNAL VALIDITY |     |     | INTERNAL VALIDITY – BIAS AND CONFOUNDING |     |     |     |     |     |     |     |     |    | Total /22 |
|-----------------------------|-----------|----|----|----|----|----|----|----|----|-----|-------------------|-----|-----|------------------------------------------|-----|-----|-----|-----|-----|-----|-----|-----|----|-----------|
|                             | Q1        | Q2 | Q3 | Q4 | Q5 | Q6 | Q7 | Q8 | Q9 | Q10 | Q11               | Q12 | Q13 | Q16                                      | Q17 | Q18 | Q19 | Q20 | Q21 | Q22 | Q25 | Q26 |    |           |
| Morrison <sup>67</sup>      | 1         | 1  | 0  | 1  | 0  | 1  | 1  | 1  | 0  | 1   | 1                 | UTD | 1   | 1                                        | 1   | 1   | 1   | 1   | 1   | n/a | UTD | UTD | 15 |           |
| Muller <sup>90</sup>        | 1         | 1  | 0  | 1  | 0  | 1  | 1  | 1  | 0  | 0   | 1                 | UTD | 1   | 1                                        | 1   | 1   | 1   | 1   | 1   | n/a | UTD | UTD | 14 |           |
| Murphy <sup>68</sup>        | 1         | 1  | 0  | 1  | 0  | 1  | 1  | 1  | 0  | 1   | 1                 | UTD | 1   | 1                                        | 1   | 1   | 1   | 1   | 1   | n/a | UTD | UTD | 15 |           |
| Norgaard <sup>38</sup>      | 1         | 1  | 0  | 1  | 0  | 1  | 1  | 1  | 0  | 0   | 1                 | UTD | 1   | 1                                        | 1   | 1   | 1   | 1   | 1   | n/a | UTD | UTD | 14 |           |
| Oliver <sup>69</sup>        | 1         | 1  | 0  | 1  | 0  | 1  | 0  | 1  | 0  | 1   | 1                 | UTD | 1   | 1                                        | 1   | 1   | 1   | 1   | 1   | n/a | UTD | UTD | 14 |           |
| Paone <sup>84</sup>         | 1         | 1  | 0  | 1  | 0  | 1  | 0  | 1  | 0  | 1   | 1                 | UTD | 1   | 1                                        | 1   | 1   | 1   | 1   | 1   | n/a | UTD | UTD | 14 |           |
| Pentti <sup>100</sup>       | 1         | 1  | 0  | 1  | 0  | 1  | 1  | 1  | 0  | 1   | 1                 | UTD | 1   | 1                                        | 1   | 1   | 1   | 1   | 1   | n/a | UTD | UTD | 15 |           |
| Politsmakher <sup>103</sup> | 0         | 1  | 0  | 1  | 0  | 1  | 0  | 1  | 0  | 0   | 1                 | UTD | 1   | 1                                        | 1   | 1   | 1   | 1   | 1   | n/a | UTD | UTD | 12 |           |
| Rana <sup>70</sup>          | 1         | 1  | 0  | 1  | 0  | 1  | 1  | 1  | 0  | 1   | 1                 | UTD | 1   | 1                                        | 1   | 1   | 1   | 1   | 1   | n/a | UTD | UTD | 15 |           |
| Rehm <sup>71</sup>          | 0         | 1  | 0  | 1  | 0  | 1  | 0  | 1  | 0  | 0   | 1                 | UTD | 1   | 1                                        | 1   | 1   | 1   | 1   | 1   | n/a | UTD | UTD | 12 |           |
| Rineau <sup>93</sup>        | 1         | 1  | 0  | 1  | 0  | 1  | 0  | 1  | 0  | 1   | 1                 | UTD | 1   | 1                                        | 1   | 1   | 1   | 1   | 1   | n/a | UTD | UTD | 14 |           |
| Rothschild <sup>31</sup>    | 1         | 1  | 1  | 1  | 0  | 1  | 1  | 1  | 0  | 1   | 1                 | UTD | 1   | 1                                        | 0   | 1   | 1   | 1   | 1   | n/a | UTD | UTD | 15 |           |
| Rosen <sup>72</sup>         | 1         | 0  | 0  | 1  | 0  | 1  | 0  | 1  | 0  | 0   | 1                 | UTD | 1   | 1                                        | 1   | 1   | 1   | 1   | 1   | n/a | UTD | UTD | 12 |           |
| Spencer <sup>73</sup>       | 1         | 1  | 0  | 1  | 0  | 1  | 0  | 1  | 0  | 0   | 1                 | UTD | 1   | 1                                        | 1   | 1   | 1   | 1   | 1   | n/a | UTD | UTD | 13 |           |
| Tavares <sup>74</sup>       | 1         | 1  | 0  | 1  | 0  | 1  | 1  | 1  | 0  | 1   | 1                 | UTD | 1   | 1                                        | 1   | 1   | 1   | 1   | 1   | n/a | UTD | UTD | 15 |           |
| Ternstrom <sup>75</sup>     | 1         | 1  | 0  | 1  | 0  | 1  | 1  | 1  | 0  | 1   | 1                 | UTD | 1   | 1                                        | 1   | 1   | 1   | 1   | 1   | n/a | UTD | UTD | 15 |           |
| Torella <sup>96</sup>       | 0         | 1  | 0  | 1  | 0  | 1  | 1  | 1  | 0  | 1   | 1                 | UTD | 1   | 1                                        | 1   | 1   | 1   | 1   | 1   | n/a | UTD | UTD | 14 |           |
| Tseng <sup>106</sup>        | 1         | 1  | 0  | 1  | 0  | 1  | 0  | 0  | 0  | 1   | 1                 | UTD | 1   | 1                                        | 1   | 1   | 1   | 1   | 1   | n/a | UTD | UTD | 13 |           |

| Study                      | REPORTING |    |    |    |    |    |    |    |    |     | EXTERNAL VALIDITY |     |     | INTERNAL VALIDITY – BIAS AND CONFOUNDING |     |     |     |     |     |     |     |     |    | Total /22 |
|----------------------------|-----------|----|----|----|----|----|----|----|----|-----|-------------------|-----|-----|------------------------------------------|-----|-----|-----|-----|-----|-----|-----|-----|----|-----------|
|                            | Q1        | Q2 | Q3 | Q4 | Q5 | Q6 | Q7 | Q8 | Q9 | Q10 | Q11               | Q12 | Q13 | Q16                                      | Q17 | Q18 | Q19 | Q20 | Q21 | Q22 | Q25 | Q26 |    |           |
| Tuckfield <sup>102</sup>   | 1         | 1  | 0  | 1  | 0  | 1  | 0  | 1  | 0  | 1   | 1                 | UTD | 1   | 1                                        | 1   | 1   | 1   | 1   | 1   | n/a | UTD | UTD | 14 |           |
| Valentine <sup>85</sup>    | 1         | 1  | 0  | 1  | 0  | 1  | 1  | 1  | 0  | 1   | 1                 | UTD | 1   | UTD                                      | 1   | 1   | 1   | 1   | 1   | n/a | UTD | UTD | 14 |           |
| Vos <sup>76</sup>          | 1         | 1  | 0  | 1  | 0  | 1  | 0  | 1  | 0  | 0   | 1                 | UTD | 1   | 1                                        | 1   | 1   | 1   | 1   | 1   | n/a | UTD | UTD | 13 |           |
| Vrotsos <sup>94</sup>      | 0         | 1  | 0  | 1  | 0  | 1  | 0  | 1  | 0  | 0   | 1                 | UTD | 1   | 1                                        | 1   | 1   | 1   | 1   | 1   | n/a | UTD | UTD | 12 |           |
| Whitney <sup>95</sup>      | 1         | 1  | 0  | 1  | 0  | 1  | 1  | 1  | 0  | 1   | 1                 | UTD | 1   | 1                                        | 1   | 1   | 1   | 1   | 1   | n/a | UTD | UTD | 15 |           |
| Yaffee <sup>86</sup>       | 1         | 1  | 0  | 1  | 0  | 1  | 1  | 1  | 0  | 1   | 1                 | UTD | 1   | 1                                        | 0   | 1   | 1   | 1   | 1   | n/a | UTD | UTD | 14 |           |
| Yeh <sup>77</sup>          | 1         | 1  | 0  | 1  | 0  | 1  | 1  | 1  | 0  | 1   | 1                 | UTD | 1   | 1                                        | 1   | 1   | 1   | 1   | 1   | n/a | UTD | UTD | 15 |           |
| Yerrabothala <sup>78</sup> | 1         | 1  | 0  | 1  | 0  | 1  | 1  | 1  | 0  | 1   | 1                 | UTD | 1   | 1                                        | 1   | 1   | 1   | 1   | 1   | n/a | UTD | UTD | 15 |           |
| Zelinka <sup>79</sup>      | 0         | 1  | 0  | 1  | 0  | 1  | 0  | 1  | 0  | 0   | 1                 | UTD | 1   | 1                                        | 1   | 1   | 1   | 1   | 1   | n/a | UTD | UTD | 12 |           |
