# Supplementary material
Source: HighWire-hosted journal article supplement (https://bmjopen.bmj.com/content/8/5/e019912)

Supplementary File 9. Forest Plot for Odds of Patients Being Transfused Sorted by Year of Publication

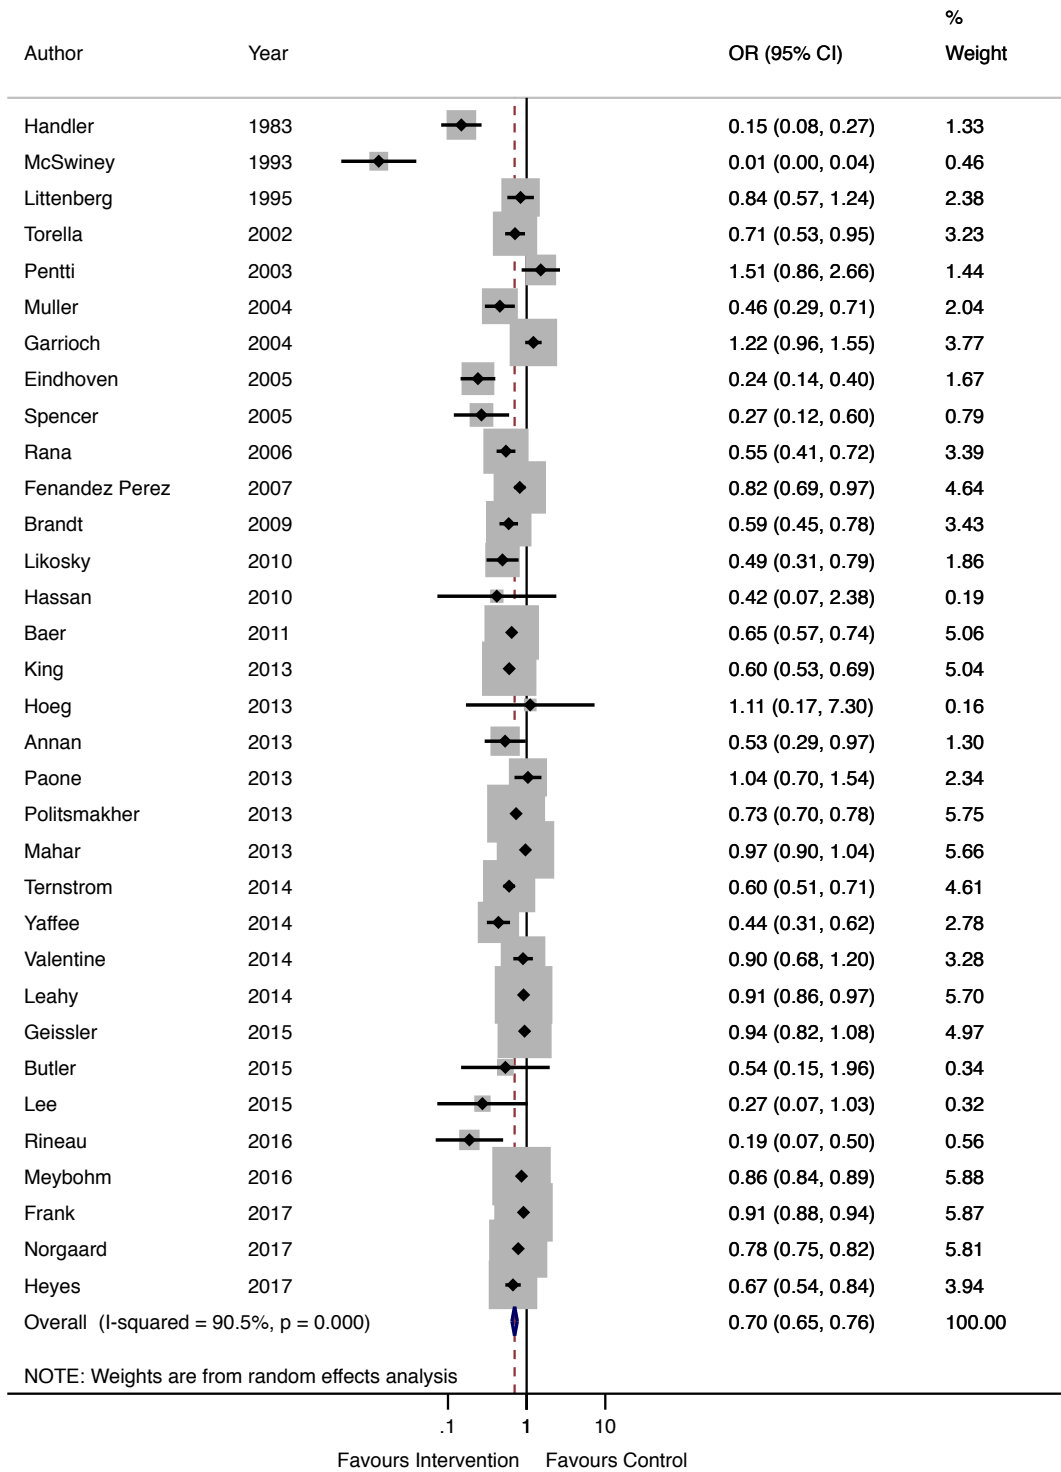

Supplement: inline-supplementary-material-9 [file inline-supplementary-material-9.pdf]
