# Supplementary material
Source: HighWire-hosted journal article supplement (https://bmjopen.bmj.com/content/8/5/e019912)
Supplement: inline-supplementary-material-12 [file inline-supplementary-material-12.pdf]

Supplementary File 16. Results of Meta-Regression Analysis

| <b>Covariate</b>                            | <b>Patients Transfused</b> |                |
|---------------------------------------------|----------------------------|----------------|
|                                             | Coefficient of logOR (SE)  | <i>p</i> value |
| Year of Publication                         | 0.002<br>(0.014)           | 0.915          |
| Number of Interventions                     | 0.052<br>(0.062)           | 0.406          |
| Multi-Modal Intervention                    | -0.011<br>(0.163)          | 0.948          |
| Setting in Single Unit/<br>Clinical Service | -0.108<br>(0.163)          | -0.660         |
| Follow-up $\geq$ 1 year                     | 0.008<br>(0.165)           | 0.960          |
| Education                                   | 0.111<br>(0.160)           | 0.491          |
| Guideline                                   | 0.010<br>(0.153)           | 0.949          |
| Audit and Feedback                          | 0.163<br>(0.158)           | 0.311          |
| CPOE and Decision Support                   | 0.075<br>(0.175)           | 0.670          |
| Protocol/ Algorithm                         | -0.150<br>(0.175)          | 0.398          |
| Reminder                                    | 0.361<br>(0.263)           | 0.181          |
| Policy                                      | 0.135<br>(0.230)           | 0.561          |
| Audit Approval                              | 0.074<br>(0.366)           | 0.842          |
| Audit                                       | 0.064<br>(0.225)           | 0.777          |
| Paper Order Entry                           | -0.205<br>(0.342)          | 0.554          |
