# Supplementary material
Source: HighWire-hosted journal article supplement (https://bmjopen.bmj.com/content/8/5/e019912)
Supplement: inline-supplementary-material-15 [file inline-supplementary-material-15.pdf]

### Supplementary File 13. Forest Plot for the Mean Hospital Length of Stay (days)

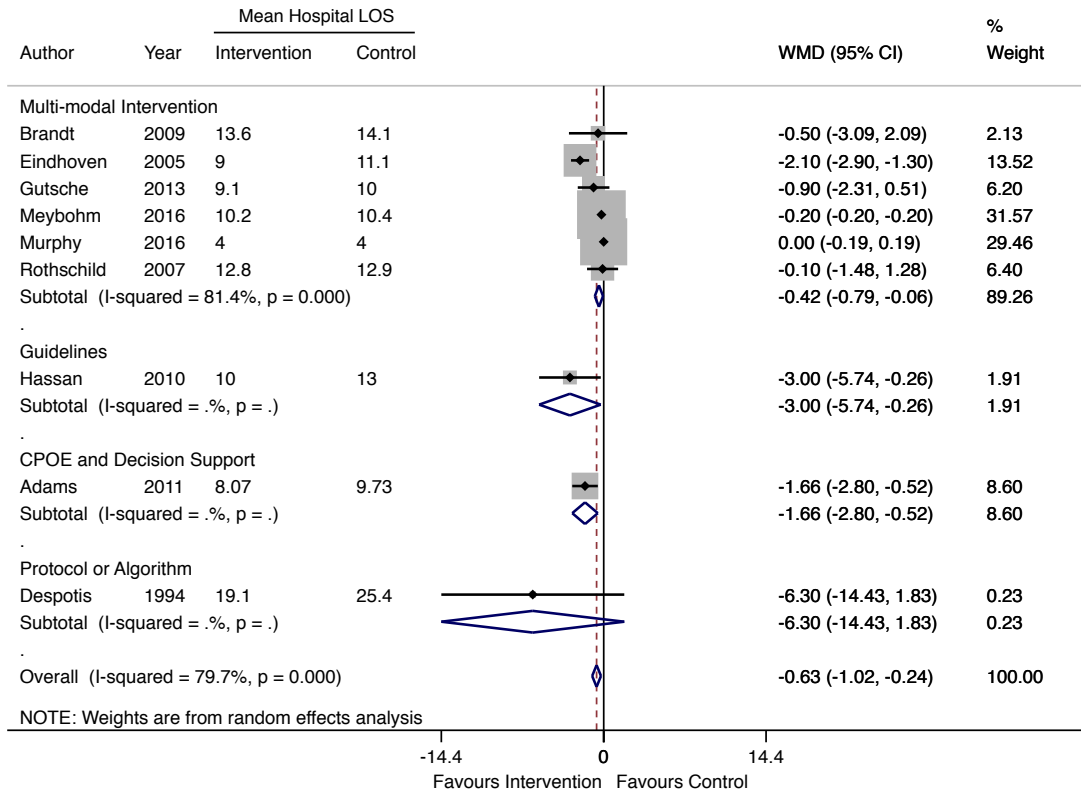

NOTE: Weights are from random effects analysis
