# Supplementary material
Source: HighWire-hosted journal article supplement (https://bmjopen.bmj.com/content/8/5/e019912)

### Supplementary File 15. Forest Plot for the Odds of In-hospital Mortality

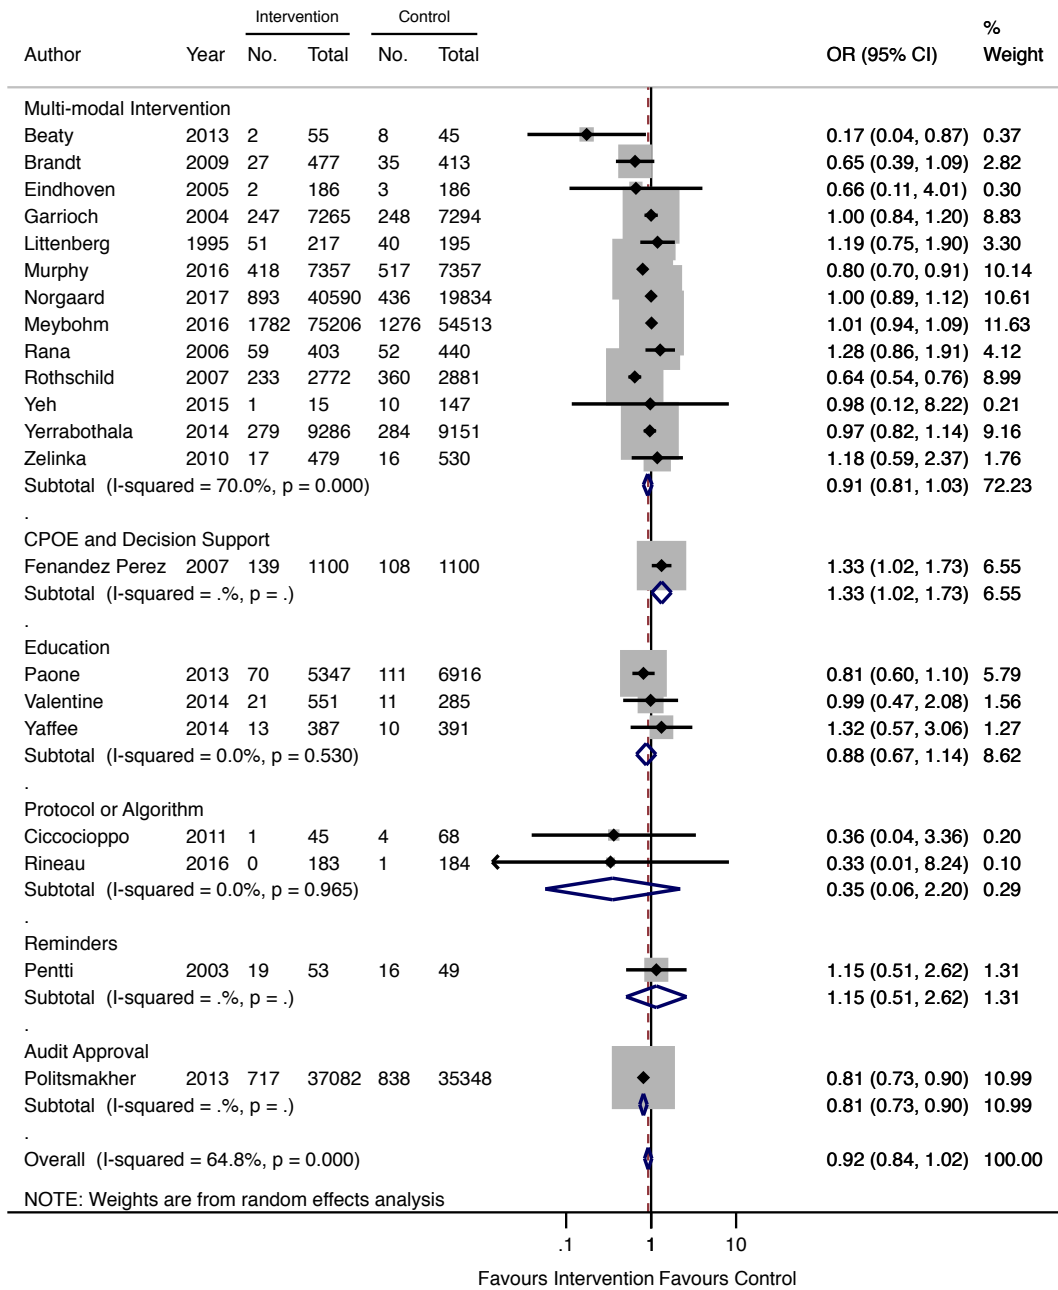

Supplement: inline-supplementary-material-11 [file inline-supplementary-material-11.pdf]

### Supplementary File 11. Forest Plot for the Odds of Patients Being Inappropriately Transfused

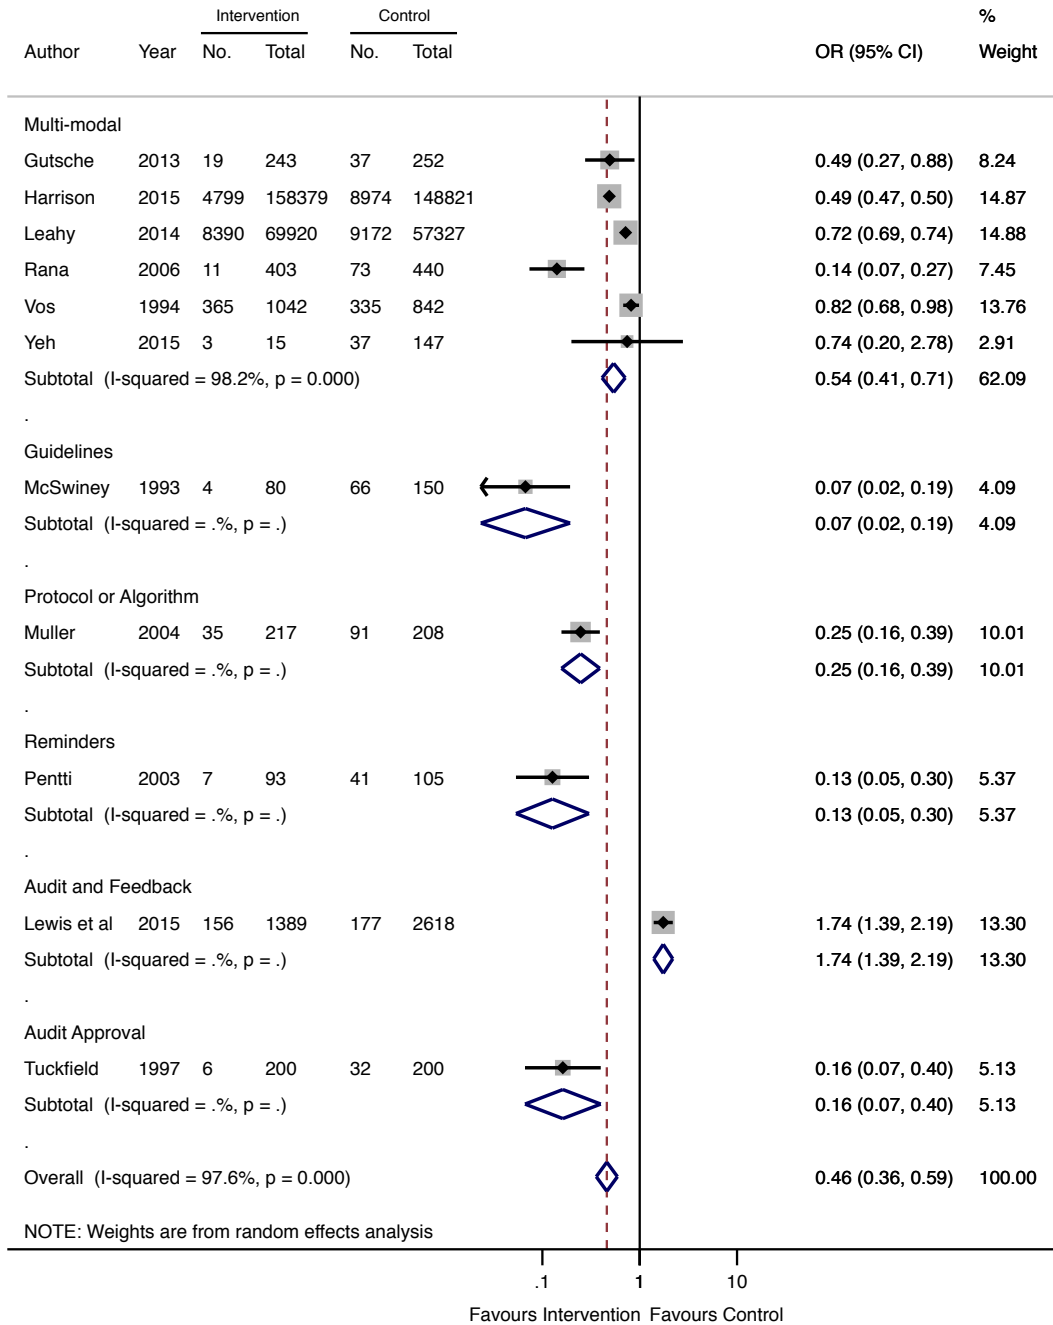

Supplement: inline-supplementary-material-13 [file inline-supplementary-material-13.pdf]

Supplementary File 12. Forest Plot for the Mean Number of RBC Units Transfused Per Patient

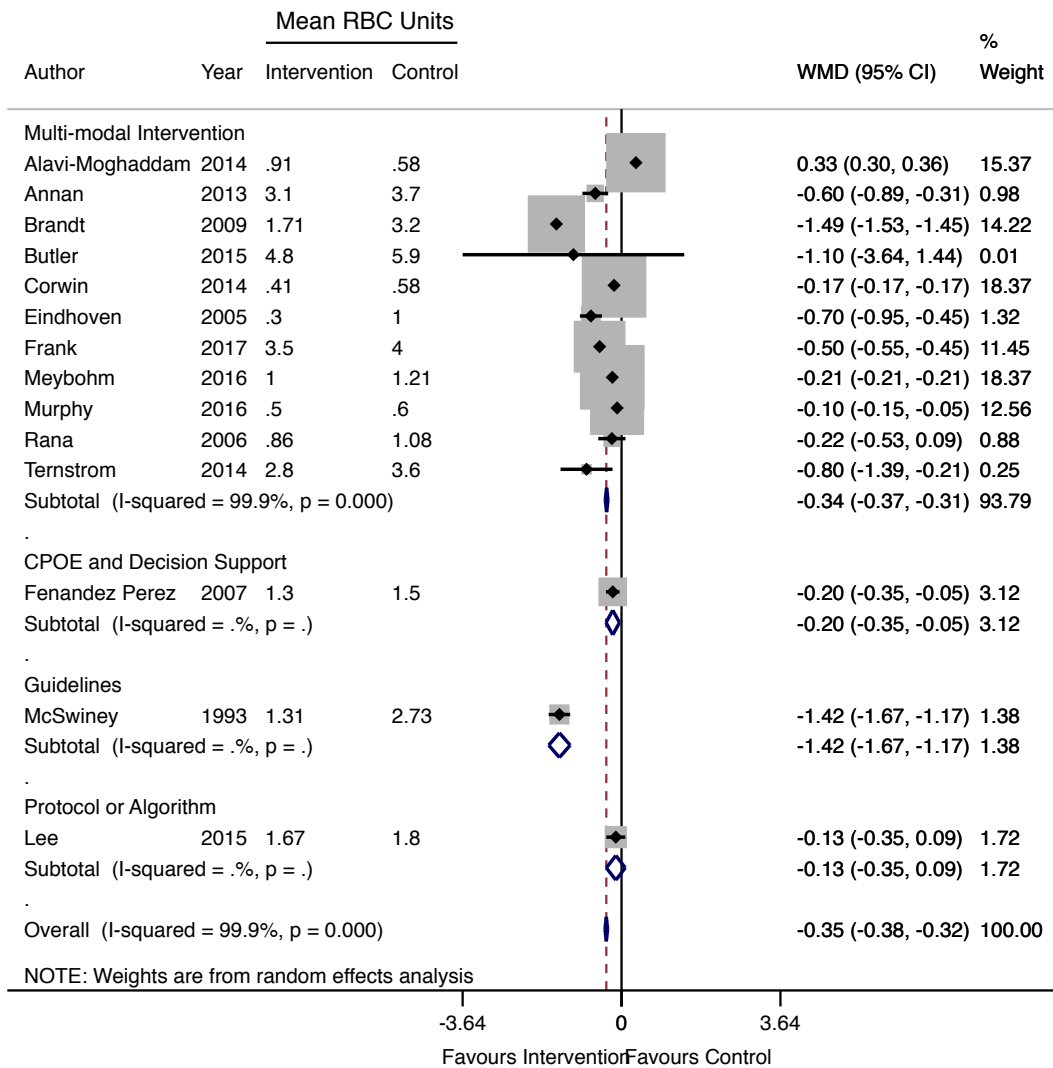

Supplement: inline-supplementary-material-14 [file inline-supplementary-material-14.pdf]

### Supplementary File 14. Forest Plot for the Mean Pre-transfusions Hemoglobin Level (g/dL)

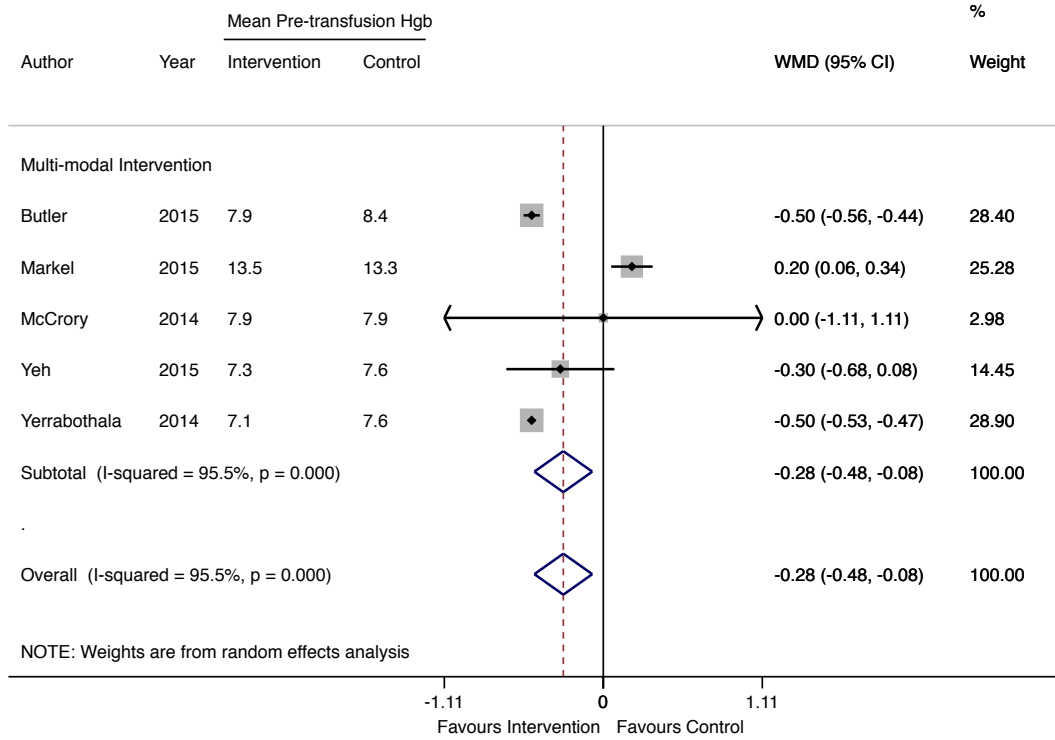

Supplement: inline-supplementary-material-16 [file inline-supplementary-material-16.pdf]
